1 **Development of a Novel CD4<sup>+</sup> TCR Transgenic Line that Reveals a**  
2 **Dominant Role for CD8<sup>+</sup> DC and CD40-Signaling in the Generation of**  
3 **Helper and CTL Responses to Blood Stage Malaria**  
4  
5 **Short title: Development of a Novel CD4<sup>+</sup> TCR Transgenic Line to**  
6 **Malaria**

7  
8 Daniel Fernandez-Ruiz<sup>1</sup>, Lei Shong Lau<sup>1</sup>, Nazanin Ghazanfari<sup>1,2</sup>, Claerwen M Jones<sup>1</sup>, Wei  
9 Yi Ng<sup>1</sup>, Gayle M Davey<sup>1</sup>, Dorothee Berthold<sup>1</sup>, Lauren Holz<sup>1,2</sup>, Yu Kato<sup>1</sup>, Ganchimeg  
10 Bayarsaikhan<sup>1,3</sup>, Sanne H. Hendriks<sup>1</sup>, Kylie R James<sup>4</sup>, Anton Cozijnsen<sup>5</sup>, Vanessa Mollard<sup>5</sup>,  
11 Tania F de Koning-Ward<sup>6</sup>, Paul R Gilson<sup>7</sup>, Tsuneyasu Kaisho<sup>8</sup>, Ashrafal Haque<sup>4</sup>, Brendan  
12 S Crabb<sup>7</sup>, Francis R Carbone<sup>1</sup>, Geoffrey I. McFadden<sup>5</sup>, William R Heath<sup>1,2</sup>

13

14 1. Department of Microbiology and Immunology, Peter Doherty Institute for Infection and  
15 Immunity, University of Melbourne, Victoria 3000, Australia

16 2. The ARC Centre of Excellence in Advanced Molecular Imaging, University of  
17 Melbourne, Parkville, Victoria 3010, Australia.

18 3. Division of Immunology, Department of Molecular Microbiology and Immunology,  
19 Graduate School of Biomedical Sciences, Nagasaki University, Sakamoto, Nagasaki 852-  
20 8523, Japan

21 4. Malaria Immunology Laboratory, QIMR Berghofer Medical Research Institute, Herston,  
22 Queensland 4006, Australia

- 1 5. The School of BioSciences, University of Melbourne, Parkville, Victoria 3010, Australia
- 2 6. School of Medicine, Deakin University, Waurin Ponds, Victoria 3216, Australia,
- 3 7. Macfarlane Burnet Institute for Medical Research & Public Health, Victoria 3004,
- 4 Australia
- 5 8. Department of Immunology, Institute of Advanced Medicine, Wakayama Medical
- 6 University, Wakayama, Wakayama 641-8509, Japan
- 7
- 8 Corresponding author: William R Heath ([wrheath@unimelb.edu.au](mailto:wrheath@unimelb.edu.au))

1 **Abstract**

2

3 **We describe an MHC II (IA<sup>b</sup>)-restricted T cell receptor (TCR) transgenic mouse line**  
4 **that produces CD4<sup>+</sup> T cells specific for *Plasmodium* species. This line, termed PbT-II,**  
5 **was derived from a CD4<sup>+</sup> T cell hybridoma generated to blood-stage *Plasmodium***  
6 ***berghei* ANKA (PbA). PbT-II cells responded to all *Plasmodium* species and stages**  
7 **tested so far, including rodent (PbA, *P. berghei* NK65, *P. chabaudi* AS and *P. yoelii***  
8 **17XNL) and human (*P. falciparum*) blood-stage parasites as well as irradiated PbA**  
9 **sporozoites. PbT-II cells can provide help for generation of antibody to *P. chabaudi***  
10 **infection and can control this otherwise lethal infection in CD40L-deficient mice.**  
11 **PbT-II cells can also provide help for development of CD8<sup>+</sup> T cell-mediated**  
12 **experimental cerebral malaria (ECM) during PbA infection. Using PbT-II CD4<sup>+</sup> T**  
13 **cells and the previously described PbT-I CD8<sup>+</sup> T cells, we determined the dendritic**  
14 **cell (DC) subsets responsible for immunity to PbA blood-stage infection. CD8<sup>+</sup> DC (a**  
15 **subset of XCR1<sup>+</sup> DC) were the major antigen presenting cell (APC) responsible for**  
16 **activation of both T cell subsets, though other DC also contributed to CD4<sup>+</sup> T cell**  
17 **responses. Depletion of CD8<sup>+</sup> DC at the beginning of infection prevented ECM**  
18 **development and impaired both Th1 and Tfh responses; in contrast, late depletion**  
19 **did not affect ECM. This study describes a novel and versatile tool for examining**  
20 **CD4<sup>+</sup> T cell immunity during malaria and provides evidence that CD4<sup>+</sup> T cell help,**  
21 **acting via CD40L signalling, can promote immunity or pathology to blood stage**  
22 **malaria largely through antigen presentation by CD8<sup>+</sup> DC.**

23

## 1 **Introduction**

2

3 Despite intervention strategies, malaria killed almost half a million people in 2015 (1).

4 Murine models for malaria present similarities with human infections and allow for the

5 detailed study of immunological processes of potential relevance to human disease (2-8).

6 T cell receptor (TCR) transgenic murine lines specific for pathogen-derived antigens are

7 powerful tools for studying the mechanisms involved in the development of immune

8 responses during infection. Their ease of use and potential for manipulation offers a much

9 broader range of opportunities for the study of T cell responses than are feasible using the

10 endogenous T cell repertoire.

11

12 The lack of TCR transgenic mouse lines specific for *Plasmodium* antigens led to the

13 generation of transgenic malaria parasites expressing model antigens, such as PbTG and

14 OVA-PbA (2, 4, 9, 10), for which widely used murine T cell lines such as OT-I and OT-II

15 could be used to monitor specific T cell responses. While the use of these parasites in

16 conjunction with model T cell lines has aided the study of anti-malarial CD4<sup>+</sup> and CD8<sup>+</sup> T

17 cell responses (6, 11-15), wild-type parasites and transgenic T cells capable of recognizing

18 authentic parasite-derived antigens are preferred as they more closely resemble

19 endogenous responses to natural infections. With this in mind, we recently generated a

20 murine T cell receptor (TCR) transgenic line of *P. berghei* ANKA (PbA)-specific CD8<sup>+</sup> T

21 cells, termed PbT-I (8, 16). Here, we introduce a new MHC II-restricted (IA<sup>b</sup>) TCR murine

22 line, termed PbT-II, that responds to a parasite antigen expressed across multiple rodent

23 and human *Plasmodium* species, making it a general tool for studying malaria immunity in

1 C57BL/6 (B6) mice. PbT-II TCR transgenic mice add to the existing I-E<sup>d</sup>-restricted B5  
2 TCR transgenic mice (2, 4, 17) to extend the set of available tools for the analysis of CD4<sup>+</sup>  
3 T cell responses to parasites during *Plasmodium* infection of B6 mice.  
4  
5 CD4<sup>+</sup> T cells orchestrate both humoral and cellular adaptive immune responses against  
6 pathogens. Cross-talk between CD4<sup>+</sup> T cells and naïve B cells resulting in Ig class  
7 switching is essential for the clearance of certain pathogens such as *P. chabaudi* AS. Thus,  
8 mice lacking CD4<sup>+</sup> T cells or B cells are unable to control parasitaemia in this model (17).  
9 Another important role for CD4<sup>+</sup> T cells is the provision of help resulting in the licensing  
10 of dendritic cells (DC) for the effective priming of CD8<sup>+</sup> T cells. However, while CD4<sup>+</sup> T  
11 cell help is essential for primary responses to certain pathogens, such as herpes simplex  
12 virus (HSV) (11, 18), it is dispensable during infection with influenza A virus, lymphocytic  
13 choriomeningitis virus or *Listeria monocytogenes* (14, 19-21). It is understood that in the  
14 latter cases, sufficient engagement of receptors for pathogen associated molecular patterns  
15 (PAMP) on DC by material derived from the infectious agent (6, 22), or cytokines secreted  
16 by innate cells upon recognition of the pathogen (23, 24), bypass the need for CD4<sup>+</sup> T cell  
17 help. In the case of PbA infection, the helper dependence of CD8<sup>+</sup> T cell responses has not  
18 been directly addressed. PbA infection of B6 mice leads to the development of  
19 experimental cerebral malaria (ECM), a pathology mediated by CD8<sup>+</sup> T cells that is used  
20 as a model for human cerebral malaria (25). Therefore, dissection of the mechanisms that  
21 lead to CD8<sup>+</sup> T cell activation in this model is of importance to better understand this  
22 pathology. ECM was abolished when CD4<sup>+</sup> T cells were depleted during the early stages  
23 of the infection in a number of studies (26-30), suggesting that CD8<sup>+</sup> T cell priming relies

1 on CD4<sup>+</sup> T cell help. Indeed, depletion of CD4<sup>+</sup> T cells during infection with the transgenic  
2 malaria parasite PbTG resulted in diminished OT-I cell proliferation (31). However,  
3 transfer of OT-I cells into PbTG-infected RAG mice, lacking T cells, resulted in the  
4 development of ECM in the absence of CD4<sup>+</sup> T cells (9). The role of CD4<sup>+</sup> T cells in  
5 activating DC for priming CTL responses during blood stage PbA infection therefore  
6 remained to be conclusively defined.

7

8 DC are effective antigen presenting cells (APC) that prime T cells for the generation of  
9 pathogen-specific adaptive immune responses. The DC compartment is comprised of a  
10 heterogeneous array of cell subsets with marked functional specialization (32).  
11 Determining the relative contribution of DC subsets to T cell priming is of great importance,  
12 especially for the development of new generations of vaccines in which antigen is delivered  
13 to a specific DC subset seeking induction of optimal T cell responses. CD8<sup>+</sup> DC possess  
14 specialised machinery to perform antigen cross-presentation to CD8<sup>+</sup> T cells, which other  
15 conventional DC lack (33, 34). However, both CD8<sup>+</sup> and CD8<sup>-</sup> DC are capable of antigen  
16 presentation to CD4<sup>+</sup> T cells via MHC class II (35, 36). Consistent with these observations,  
17 CD8<sup>+</sup> DC from mice infected with PbTG were significantly more effective than CD8<sup>-</sup> DC  
18 at presenting OVA antigen to CD8<sup>+</sup> T cells *in vitro*, whereas both DC subsets were capable  
19 of priming CD4 T cells (9). Also, depletion of CD8<sup>+</sup> DC in PbA infected mice resulted in  
20 a sharp decrease in the numbers of activated endogenous CD8<sup>+</sup> T cells in the spleen, and  
21 CD4<sup>+</sup> T cell activation was also impaired (37). A similar result was obtained when CD8<sup>+</sup>  
22 DC were depleted in *P. chabaudi* infected mice (38). Another study analysing CD4<sup>+</sup> T cell  
23 responses to *P. chabaudi* antigen showed CD8<sup>+</sup> DC as superior to CD8<sup>-</sup> DC at MHC II

1 presentation in the steady state, but the latter were more efficient during infection (39). In  
2 the *P. chabaudi* model, mice devoid of CD8<sup>+</sup> DC developed higher peaks of parasitaemia  
3 and more pronounced relapses than their wild-type (WT) counterparts (40). These results  
4 suggested an important role for CD8<sup>+</sup> DC in the development of T cell responses against  
5 blood stage malaria parasites.

6

7 Here we introduce a CD4<sup>+</sup> T cell transgenic mouse line specific for a malaria parasite  
8 antigen, termed PbT-II, that is cross-reactive with a broad range of malaria parasites  
9 including PbA, *P. chabaudi*, and *P. yoelii*, and even the human parasite *P. falciparum*.  
10 These cells are also cross-reactive, albeit weakly, to PbA sporozoites. Therefore, PbT-II  
11 cells are broadly applicable for the study of CD4<sup>+</sup> T cell function in multiple malaria  
12 models.

13

## 1 **Materials and methods**

### 2 Ethics statement

3 All procedures were performed in strict accordance with the recommendations of  
4 the Australian code of practice for the care and use of animals for scientific purposes. The  
5 protocols were approved by the Biochemistry & Molecular Biology, Dental Science,  
6 Medicine (RMH), Microbiology & Immunology, and Surgery (RMH) Animal Ethics  
7 Committee, University of Melbourne (ethic project IDs: 0810527, 0811055, 0911527,  
8 1112347, 1513505).

9

### 10 Mice, mosquitos and parasites

11 C57BL/6 (B6) mice, MHC I<sup>-/-</sup> mice (41), IAE<sup>-/-</sup> mice (MHC II-deficient) (42),  
12 Batf3<sup>-/-</sup> (43), IRF8<sup>-/-</sup> (44), XCR1-DTRvenus (45), CD11cDTR (46), CD40<sup>-/-</sup> (47) and  
13 CD40L<sup>-/-</sup> (48) mice and the transgenic strains OT-II (49), gDT-II (50), PbT-I (16) and PbT-  
14 II were used between 6-12 weeks and were bred and maintained at the Department of  
15 Microbiology and Immunology. Batf3<sup>-/-</sup> mice, kindly provided by Kenneth M. Murphy  
16 (Washington University), were backcrossed 10 generations to B6 for use in this study.  
17 Transgenic T cell lines were crossed to mice expressing GFP ubiquitously (uGFP) or with  
18 CD45.1 (Ly5.1) mice to allow for the differentiation of these cells from endogenous T cells  
19 after adoptive transfer into recipient Ly5.2 B6 mice. XCR1-DTRvenus and CD11cDTR  
20 mice were treated with diphtheria toxin (Calbiochem) as indicated in figure legend. The  
21 University of Melbourne. Animals used for the generation of the sporozoites were 4-5 week  
22 old male Swiss Webster mice purchased from Monash Animal Services (Melbourne,



1 Victoria, Australia) and maintained at the School of Botany, The University of Melbourne,  
2 Australia.

3 *Anopheles stephensi* mosquitoes (strain STE2/MRA-128 from The Malaria  
4 Research and Reference Reagent Resource Center) were reared and infected with PbA as  
5 described (51). Sporozoites were dissected from mosquito salivary glands (52),  
6 resuspended in cold PBS and irradiated with  $2 \times 10^4$  rads using a gamma  $^{60}\text{Co}$  source.  $5 \times$   
7  $10^4$  radiation-attenuated PbA sporozoites (RAS) in 0.2 ml of PBS were intravenously (i.v.)  
8 administered to recipient mice.

9 The rodent malaria lines *Plasmodium berghei* ANKA clone 15cy1 (PbA), *P.*  
10 *berghei* NK65, *P. chabaudi* AS and *P. yoelii* 17XNL were used in this study. Unless  
11 otherwise stated, mice were infected i.v. with  $10^4$  PbA, *P. berghei* NK65, *P. chabaudi* or  
12 *P. yoelii* 17XNL iRBC in 0.2 ml of PBS. The human malaria parasite *P. falciparum* 3D7  
13 was used in *in vitro* analysis.

14

#### 15 Generation of transgenic PbT-II

16 Transgenic PbT-II mice were generated using the V(D)J segments of the TCR $\alpha$ -  
17 and  $\beta$ -genes of a CD4 $^+$  T cell hybridoma (termed D78) specific for an unidentified blood-  
18 stage PbA antigen. This hybridoma was derived from T cells extracted from the spleen of  
19 a B6 mouse at day 7 after infection with PbA.  $3 \times 10^6$  splenocytes from a mouse previously  
20 infected with PbA were co-cultured with  $5 \times 10^5$  conventional DC (extracted from the  
21 spleen of FMS-like tyrosine kinase 3 receptor ligand (Flt3-L) treated B6 mice) that were  
22 pre-loaded for 2 hours with  $2 \times 10^6$  PbA schizont lysate as previously described (53) in  
23 complete RPMI at 6.5% CO $_2$ , 37°C. One week later, cultured cells were re-stimulated for

1 a week with fresh DC and PbA schizont lysate. To generate PbA-specific hybridomas, *in*  
2 *vitro* cultured cells were then fused with the BWZ36.GFP fusion partner and exposed to  
3 drug selection (54). This led to isolation of the IA<sup>b</sup>-restricted D78 hybridoma from which  
4 PbT-II T cell receptor genes were derived. V $\alpha$  and V $\beta$  usage by D78 was defined by  
5 FACS staining with a panel of V $\alpha$  TCR antibodies and the mouse V $\beta$  TCR screening  
6 panel (BD Biosciences).

7 The TCR  $\alpha$  region was amplified by PCR from the cDNA of the D78 hybridoma  
8 using the forward primer GGATCCAGGAATGGACAAGATTCTG containing a *Bam*HI  
9 recognition sequence at the 5' end, designed to bind the 5' UTR region of V $\alpha$ 2, and the  
10 reverse primer CAGATCTCAACTGGACCACAG containing a *Bgl*II recognition  
11 sequence at the 5' end, specific for the C $\alpha$  region. Sequencing analysis revealed that the  
12 TCR  $\alpha$ -chain consisted of V $\alpha$ 2.7, J $\alpha$ 12 and C $\alpha$  gene segments. The V $\alpha$ 2.7-J $\alpha$ 12-C $\alpha$   
13 segment was cloned into the *Bam*HI site of the pES4 cDNA expression vector (55).

14 TCR V $\beta$  usage was confirmed by PCR on cDNA converted from the RNA of the  
15 D78 hybridoma using the primer GAAGATGGTGGGGCTTTCAAGGATC, specific for  
16 the V $\beta$ 12 gene. Sequencing analysis revealed that the TCR  $\beta$ -chain consisted of V $\beta$ 12, D $\beta$ 2  
17 and J $\beta$ 2.4. The TCR  $\beta$ -chain VDJ segment was amplified by PCR from the genomic DNA  
18 of the D78 hybridoma using the forward primer GGATCGATCACACTTGT TTTCCGTG  
19 specific for the V $\beta$ 12, incorporating a *Cla*I restriction enzyme site at the 5' end, and the  
20 reverse primer GATCGATCAGCTCACCTAACACGAGGA specific for J $\beta$ 2.4 and  
21 incorporating a *Cla*I site at the 5' end and sequenced. The V $\beta$ 12-D $\beta$ 2-J $\beta$ 2.4 segment was  
22 found to contain a *Cla*I within its sequence, so a new segment was synthesised in which  
23 the *Cla*I site (ATCGAT, coding for the aminoacids Asp and Arg) was changed for

1 ATCGAC (no change in aminoacid sequence). The new segment was cloned into the  
2 unique *Cla*I restriction site of the p3A9C $\beta$ TCR genomic expression vector (49).

3 Alpha- and beta-chain vector sequences were removed using combined *Cla*-I/*Not*-  
4 I and *Apa*-I/*Not*-I restriction enzyme digest, respectively, and coinjected into blastocysts of  
5 B6 mice to generate transgenic founder mice.

6

7 Dendritic cell isolation

8 Dendritic cells were purified from the spleens of mice as previously described (9).  
9 Briefly, spleens were finely minced and digested in 1 mg/ml collagenase 3 (Worthington)  
10 and 20  $\mu$ g/ml DNase I (Roche) under intermittent agitation for 20 min at room temperature.  
11 DC-T cell complexes were then disrupted by adding EDTA (pH 7.2) to the digest to a final  
12 concentration of 7.9 mM and continuing the incubation for 5 more min. After removing  
13 undigested fragments by filtering through a 70  $\mu$ m mesh, cells were resuspended in 5 ml  
14 of 1.077 g/cm<sup>3</sup> isosmotic nycodenz medium (Nycomed Pharma AS, Oslo, Norway),  
15 layered over 5 ml nycodenz medium and centrifuged at 1700 x g at 4°C for 12 min. In the  
16 experiments to determine MHC restriction by the hybridomas, the light density fraction  
17 was collected and DC were negatively enriched by incubation with a cocktail of rat  
18 monoclonal anti-CD3 (clone KT3-1.1), anti-Thy-1 (clone T24/31.7), anti-Gr1 (clone  
19 RB68C5), anti-CD45R (clone RA36B2) and anti-erythrocyte (clone TER119) antibodies  
20 followed by immunomagnetic bead depletion using BioMag goat anti-rat IgG beads  
21 (Qiagen).

22 In the experiments involving analyses of DC subsets, cells obtained after  
23 centrifugation in nycodenz medium were stained for CD11c, MHC II, CD8 and CD4 and

1 sorted into (MHC II<sup>hi</sup> CD11c<sup>hi</sup>) CD8<sup>+</sup>CD4<sup>-</sup> (CD8 DC), CD8<sup>-</sup>CD4<sup>+</sup> (CD4 DC) or CD8<sup>-</sup> CD4<sup>-</sup>  
2 (double-negative, DN DC) using a FACSAria III sorter (BD Biosciences).

3 DC were resuspended in complete DMEM medium supplemented with 10% foetal  
4 calf serum (FCS) before use in functional assays.

5

6 Functional assay with hybridomas and IL-2 ELISA

7 For *in vitro* stimulation assays, DC ( $5 \times 10^4$  per well) were cultured for 1h with  
8 titrated amounts of lysed whole blood containing mixed stages of PbA parasites before  
9 adding  $5 \times 10^4$  D78 or PbA-specific MHC I-restricted B4 hybridoma cells [16]. For *ex vivo*  
10 experiments, DC were extracted from the spleens of PbA infected mice on day 3 after  
11 infection with  $10^6$  iRBC.

12 After culture for 40h at 37°C in 6.5% CO<sub>2</sub>, supernatants were collected and  
13 concentrations of IL-2 were assessed using the Mouse IL-2 ELISA Ready-Set-Go kit  
14 (eBiosciences) following manufacturer's instructions. Data were represented using  
15 logarithmic scales. Because it would not be possible to represent concentration values of  
16 "0" in logarithmic scales, all data values were increased by 1. The detection limit of the  
17 Mouse IL-2 ELISA Ready-Set-Go kit is 2 pg/ml.

18 The calculation of the net contribution of DC subsets to MHC II presentation was  
19 done by multiplying the mean IL-2 values induced by CD4<sup>+</sup>, CD8<sup>+</sup> or DN DC in Fig 5B  
20 by the relative abundance of the corresponding DC subset in the spleen (in our experiments,  
21 MHC II<sup>high</sup> CD11c<sup>high</sup> cells in the spleen contained 55.1% CD4<sup>+</sup> DC, 13.4% DN DC and  
22 17.7% CD8<sup>+</sup> DC on average). The numbers obtained from all three DC subsets,  
23 representing the IL-2 stimulation corrected to relative DC abundance, were added and the

1 percentage of each individual DC subset in the total number obtain was calculated. This  
2 was done for all five DC numbers tested in Fig 5B ( $3.125 \times 10^3$  to  $50 \times 10^3$  DC per well) and  
3 the average of the five values obtained for each DC subset was calculated.

4

#### 5 Red Blood Cell coating

6 Blood was collected from a naive B6 donor. After estimating the concentration of  
7 RBC, blood was washed by adding 10 ml DMEM and centrifuging at 3750 rpm for 10 min  
8 at 4°C (with mild braking). The pellet was then diluted in a solution of DMEM containing  
9 100 mg/ml OVA (Sigma) at a concentration of  $10^5$  RBC/ $\mu$ l and incubated at 37°C for 30  
10 min. Cells were washed 3 times in PBS before being added to the DC cultures.

11 To coat RBC with PbA antigen, the concentration of parasites in a blood sample of an  
12 infected B6 donor mouse was estimated before lysing by 3 consecutive cycles of  
13 freezing/thawing in liquid nitrogen followed by passage through a 30G needle 6 times. The  
14 equivalent of 1 parasite/RBC was added to the RBC/OVA solution.

15

#### 16 Generation of bone marrow chimeras

17 B6 mice were irradiated with two doses of 550 rads 3 hours apart and reconstituted  
18 4h later with  $5 \times 10^6$  bone marrow cells. These were collected from B6 and CD11c-DTR  
19 donor mice and depleted of T cells by coating with antibodies against CD4 (RL172), CD8  
20 (3.168) and Thy1 (J1j) followed by incubation with rabbit complement for 20 min at 37°C.  
21 One day later, mice were injected intraperitoneally (i.p.) with anti-Thy1 antibody (T24) to  
22 deplete residual T cells. Chimeric mice were rested for 8-10 weeks before use, receiving

1 water containing 2.5 g/L neomycin sulphate and 0.94 g/L polymyxin B sulphate for the  
2 first 6 weeks after irradiation.

3

4 T cell isolation and *in vivo* proliferation assay

5 CD4<sup>+</sup> or CD8<sup>+</sup> T cells were negatively enriched from the spleens and lymph nodes  
6 of PbT-I/uGFP, PbT-II/uGFP, gDT-II/Ly5.1 or OT-II/Ly5.1 transgenic mice as previously  
7 described (56) and labelled with CellTrace™ Violet (CTV) or carboxyfluorescein  
8 succinimidyl ester (CFSE) following manufacturers instructions (ThermoFisher). 1x10<sup>6</sup>  
9 Purified cells were injected i.v. in 0.2 ml PBS a day before mice were infected with malaria  
10 parasites (10<sup>4</sup>, 10<sup>5</sup> or 10<sup>6</sup> iRBC or 5x10<sup>4</sup> RAS, as stated in the figure legend) or HSV (10<sup>5</sup>  
11 pfu HSV). Spleens were harvested at various time points after infection for the analysis of  
12 transgenic TCR cell proliferation by flow cytometry.

13 To deplete endogenous CD4<sup>+</sup> T cells before adoptive transfer, mice were injected  
14 i.v. with 100 µg of anti-CD4 antibody (clone GK1.5) 7 and 4 days prior to the transfer of  
15 PbT-II cells.

16

17 *In vitro* proliferation assay

18 Spleens were isolated from B6 mice that had been infected with 10<sup>6</sup> PbA iRBC 3  
19 days earlier and DC were enriched by a 1.077 g/cm<sup>3</sup> nycodenz density centrifugation  
20 followed by negative selection. 2x10<sup>5</sup> DC and 10<sup>5</sup> CTV-labelled PbT-II cells were  
21 incubated with titrated amounts of *P. falciparum*- or PbA-iRBC for 3 days. PbT-II  
22 proliferation was assessed by flow cytometry.

23

1 Flow cytometry

2 Cells were labelled with monoclonal antibodies specific for CD8 (clone 53-6.7),  
3 CD4 (RM 4-5), Thy1.2 (30-H12), MHC II (M5/114.15.2), CD11c (N418), CD45.1 (A20),  
4 V $\alpha$ 2 (B20.1), V $\beta$ 12 (MR11-1), V $\alpha$ 8.3 (B21.14), V $\beta$ 10 (B21.5) or CD69 (H1.2F3), Sirp $\alpha$   
5 (P84), Tbet (4B10), Bcl6 (K112-91), Foxp3 (FJK-165), GATA3 (L50-823), ROR $\gamma$ t (Q31-  
6 378). Dead cells were excluded by propidium iodide staining. Cells were analyzed by flow  
7 cytometry on a FACS Canto or Fortessa (BD Biosciences), using the Flowjo software  
8 (Tree Star Inc.).

9

10 For intracellular staining, cells were permeabilised using the Transcription Factor Buffer  
11 Set (BD Biosciences) following manufacturer's instructions. Dead cells were excluded  
12 using LIVE/DEAD fixable dead cell stain (Thermofisher).

13

14 For the determination of parasitaemia, 1-2  $\mu$ l blood were collected from the tail vein,  
15 diluted in FACS buffer (containing 1% w/v BSA and 5mM EDTA) and incubated at 37°C,  
16 6.5% CO<sub>2</sub> with 5 $\mu$ g/ml Hoechst 33258 (Thermofischer) for 1h before running on a Fortessa.  
17 Blood from naïve mice was used as negative control (background stain usually ranged  
18 between 0.10-0.14%)

19

20 Generation and monitoring of ECM

21 Mice infected with blood-stage PbA were monitored daily for the development of  
22 ECM. Mice were considered to have ECM when showing signs of neurological symptoms  
23 such as ataxia and paralysis, evaluated as the inability of mice to self-right.

1

2 Detection of *P. chabaudi*-specific antibody

3 Nunc-Immuno™ MicroWell™ 96-well ELISA Plates (300μL round-bottom) were  
4 coated overnight at 4°C with 50μL PBS containing *P. chabaudi* blood-stage lysate  
5 (equivalent to  $6.6 \times 10^5$  parasites/well). Unbound antigen was washed away by soaking the  
6 plates in 0.05% tween 20/PBS (i.e. wash) ×4 times. The wells were blocked with 50μL of  
7 5% skim milk/PBS for 15-30min. Plasma samples were serially diluted in 5% skim  
8 milk/PBS and incubated overnight at 4°C. The wells were washed ×6 with 0.05% tween  
9 20/PBS and incubated overnight at 4°C with 50μL of 5% skim milk/PBS containing anti-  
10 mouse IgG-HRP (1:10,000) to assess the total IgG responses. The wells were washed ×6  
11 with 0.05% tween 20/PBS and HRP was detected by adding 50μL ABTS substrate in the  
12 wells and incubating for 1.5-2h at RT. Optical density at 405nm (OD<sub>405nm</sub>) and the  
13 background at 492nm (OD<sub>492nm</sub>) was determined using an ELISA plate reader. The end-  
14 point titers were calculated by using cut-off values determined as 2×SD above average  
15 OD<sub>405nm-492nm</sub> values of control wells containing no plasma.

16 *P. chabaudi* antigen used to coat ELISA plates was prepared as follows: Blood from  
17 *P. chabaudi*-infected mice was incubated with 0.05% saponin for 3 min at RT to release  
18 parasites from RBC. Parasites were then broken up by snap freezing in liquid nitrogen and  
19 thawing 3 times, followed by 6 passages through a 30G needle.

20

21 Statistics

22 Data were log transformed for conversion into a normal distribution and then  
23 analysed using parametric statistical tests such as t-test for the comparison of 2 groups or



1 ANOVA followed by Tukey's Multiple Comparison Test for simultaneous comparison of  
2 multiple groups. *P*-values <0.05 (\*), <0.01 (\*\*) or 0.001 (\*\*\*) were considered statistically  
3 significant.  
4

## 1 **Results**

2

### 3 **Generation of an MHC II-restricted T cell hybridoma specific for PbA.**

4

5 To study the CD4<sup>+</sup> T cell response to blood stage malaria, we developed an MHC II-  
6 restricted T cell hybridoma specific for PbA. This hybridoma, termed D78, was derived by  
7 fusing the immortalized cell line BWZ36.GFP (57) to CD4<sup>+</sup> T cells isolated from the spleen  
8 of a B6 mouse infected with blood stage PbA. To assess MHC restriction of D78, DC  
9 deficient in MHC I or MHC II molecules were pre-incubated with lysate of PbA-infected  
10 red blood cells (iRBC) and then tested for stimulatory capacity (Fig 1). Whereas both WT  
11 and MHC I knockout (KO) DC were able to efficiently stimulate this hybridoma, IA<sup>b</sup>  
12 deficient (MHC II KO) DC were non-stimulatory. In contrast, MHC II KO DC were able  
13 to stimulate a PbA-specific MHC I-restricted hybridoma (16), showing these DC were  
14 functional (Fig S1A). Furthermore, D78 responded efficiently to PbA iRBC lysate, but  
15 failed to respond to DC activated by non-specific stimuli such as LPS, polyI:C or CpG,  
16 thus excluding self-reactivity or reactivity to foetal calf serum proteins (Fig S1B). Together,  
17 these findings indicated that the D78 hybridoma was MHC II-restricted and specific for  
18 malaria antigen.

19

### 20 **Generation of a PbA-specific TCR transgenic line.**

21

22 To enable monitoring of CD4<sup>+</sup> T cell immunity to PbA *in vivo*, an MHC II-restricted T cell  
23 receptor (TCR) transgenic mouse line was developed using the TCR alpha and beta chains

1 expressed by D78. This line has been termed PbT-II, consistent with our nomenclature for  
2 MHC I and II restricted OVA-specific lines OT-I and OT-II and our recently reported MHC  
3 I-restricted PbA-specific line specific, termed PbT-I (16). Analysis of the spleen and  
4 inguinal lymph node (iLN) of PbT-II mice revealed skewing towards CD4<sup>+</sup> T cells as well  
5 as efficient expression of the V $\alpha$ 2 and V $\beta$ 12 transgenes derived from D78 (Fig 2 and S1D).  
6 Total cellularity in the spleen of PbT-II mice was similar to WT mice, with CD4<sup>+</sup> T cells  
7 largely compensating for reduced numbers of CD8<sup>+</sup> T cells in the former (Fig S1E). Some  
8 reduction in the total cellularity of the iLN was evident, but the reason for this is unclear.  
9 Of note, increased numbers of CD4<sup>-</sup> CD8<sup>-</sup> (double-negative (DN)) T cells were also found  
10 in the spleen and iLN of PbT-II mice. In the thymus, PbT-II mice showed an increased  
11 number and proportion of single positive CD4<sup>+</sup> T cells and double negative T cells (Fig  
12 S1C and S1E Fig). Similar to previously described TCR transgenic mice, total cellularity  
13 was reduced in the thymus, indicative of efficient positive selection (16, 58).

14

### 15 **PbT-II cells respond to multiple *Plasmodium* species and life-cycle stages.**

16

17 PbT-II mice were generated without knowledge of their specific peptide antigens. To  
18 further characterise the specificity of this line, we tested responsiveness to different species  
19 of malaria parasites. CellTrace<sup>TM</sup> Violet (CTV)-labelled PbT-II cells were adoptively  
20 transferred into B6 mice one day before infection with iRBC from either PbA, *P. berghei*  
21 NK65, *P. chabaudi* or *P. yoelii* 17XNL. Several days later, PbT-II proliferation was  
22 assessed in the spleen, revealing reactivity to all *Plasmodium* species (Fig 3A). This result  
23 prompted us to determine whether PbT-II cells also responded to the human malaria

1 parasite *P. falciparum*. *In vitro* culture of PbT-II cells with DC and blood-stage *P.*  
2 *falciparum* lysate resulted in PbT-II proliferation comparable to that seen in response to  
3 PbA (Fig 3B), indicating that the antigen recognised by PbT-II cells is conserved in  
4 multiple *Plasmodium* species.

5

6 We then asked whether the antigen recognized by PbT-II cells was also expressed by pre-  
7 erythrocytic stage PbA parasites. To examine this, CTV-labelled PbT-II cells were  
8 adoptively transferred into B6 mice that were then infected with radiation-attenuated  
9 sporozoites (RAS) that do not develop into blood stage infection. This revealed significant,  
10 though weak proliferation of PbT-II cells 6 days later, indicating some reactivity to the pre-  
11 erythrocytic stage of PbA (Fig 3C).

12

13 Because the PbT-II cells proliferated in every assay we performed, we wanted to confirm  
14 *in vivo* that such responsiveness was due to the recognition of a malaria parasite-derived  
15 epitope, and not to non-specific inflammatory signals. We transferred gDT-II cells, which  
16 are CD4<sup>+</sup> T cells specific for HSV, and PbT-II cells into B6 mice that were intravenously  
17 infected with 10<sup>5</sup> HSV plaque-forming units (pfu) one day later. Whereas gDT-II cells  
18 proliferated extensively by day 10 after infection, PbT-II cells remained undivided (Fig  
19 S1F).

20

21 Taken together, these results revealed a broad responsiveness of PbT-II cells to malaria  
22 parasites, including different life-cycle stages and species, showcasing the potential for  
23 these T cells as tools to broadly study CD4<sup>+</sup> T cell responses in malaria.

1

2 **PbT-II cells can provide immunity to *P. chabaudi* infection.**

3

4 Both B cells and helper T cells are essential for the control of *P. chabaudi* parasitaemia  
5 (59, 60) and protection is mainly achieved by parasite-specific T cell-dependent antibodies  
6 (17). This model was therefore ideally suited to test whether PbT-II cells have the capacity  
7 to provide protective immunity to malaria. We transferred PbT-II cells into CD40L-  
8 deficient mice, in which endogenous CD4<sup>+</sup> T cells are unable to provide help to B cells  
9 (47), and infected these mice with 10<sup>4</sup> *P. chabaudi* iRBC. CD40L-deficient mice lacking  
10 PbT-II cells succumbed to infection during the peak of parasitaemia on day 9 p.i., or shortly  
11 thereafter, whereas those adoptively transferred with PbT-II cells survived >30 days  
12 (Figure 4A, S2). These latter mice developed a second peak of parasitaemia on day 19 p.i.  
13 that occurred earlier and was higher than that of wild-type (WT) mice (Fig 4B and S2).  
14 Although parasitaemia was still detectable on day 26 after infection, CD40L-deficient mice  
15 that received PbT-II cells had recovered from disease symptoms, as revealed by increased  
16 body weight to pre-infection levels (Fig S2), and were sacrificed >50 days after infection  
17 without signs of disease. Analysis of the plasma of these mice on day 9 after infection also  
18 revealed increased levels of *P. chabaudi*-specific IgG in CD40L-deficient mice that  
19 received PbT-II cells compared to those that did not receive cells (Fig 4C).

20

21 The protective effect of PbT-II cells for *P. chabaudi* infection was not limited to the  
22 production of antibodies, as adoptive transfer of PbT-II cells into RAG1-deficient mice,  
23 which are devoid of T cells and B cells, also resulted in a significantly prolonged survival

1 (Fig 4A). The first peak of parasitaemia, on day 9 after infection, was significantly higher  
2 in RAG1-deficient mice that did not receive PbT-II cells than in WT mice and RAG1-  
3 deficient mice that received PbT-II cells (Fig 4B and S2). Unlike as seen for CD40L-  
4 deficient mice, however, PbT-II cells did not enable RAG1-deficient mice to fully control  
5 parasitaemia and these mice eventually succumbed to infection (Fig 4A, B and S2).

6

7 These results clearly show PbT-II cells promoted immunity against *P. chabaudi* infection  
8 via antibody production and antibody-independent mechanisms that contributed to the  
9 control of parasitaemia.

10

### 11 **CD8<sup>+</sup> Dendritic Cells are the main antigen presenting cells for PbT-II cells.**

12 Previous reports using DC from infected mice *ex vivo* have implicated both CD8<sup>+</sup> and CD8<sup>-</sup>  
13 DC in MHC II-restricted antigen presentation during blood-stage malaria infection (9, 39,  
14 61). To examine the capacity of conventional DC (cDC) subsets to present malaria antigens  
15 to CD4<sup>+</sup> T cells, we enriched cDC (defined as CD11c<sup>high</sup> MHC class II<sup>high</sup> cells) from the  
16 spleens of naïve mice and subdivided them into three subsets: CD8<sup>+</sup>CD4<sup>-</sup>, CD8<sup>-</sup>CD4<sup>+</sup> and  
17 CD8<sup>-</sup>CD4<sup>-</sup> DC (CD8<sup>+</sup>, CD4<sup>+</sup> and DN DC respectively) (62). CD8<sup>+</sup> DC also express XCR1  
18 (45), Clec9A (63), CD24 and DEC205 (62), and lack expression of Sirpα (Fig S3A). CD4<sup>+</sup>  
19 DC are the most abundant of the three subtypes (making up around 55% of all cDC), and  
20 express CD11b (62) and Sirpα (Fig S3A). DN DC are a heterogeneous group of DC in  
21 which most cells express Sirpα and CD11b, but a small group lack Sirpα (Fig S3A), likely  
22 cDC precursors(64). We incubated purified DC subtypes with PbA iRBC and the D78  
23 hybridoma *in vitro* and assessed the hybridoma responses (Fig 5A). While all three DC

1 subsets were capable of stimulating D78, their efficacy varied considerably: CD8<sup>+</sup> DC  
2 induced the strongest responses; DN DC had an intermediate stimulatory capacity and  
3 CD4<sup>+</sup> DC were significantly less efficient than any of the other subtypes. A similar result  
4 was obtained when the three cDC subsets were purified from the spleens of B6 mice that  
5 had been infected with PbA 3 days earlier (Fig 5B). In this case, the stimulation exerted by  
6 DN DC and CD4<sup>+</sup> DC was comparable and significantly lower than that of CD8<sup>+</sup> DC.

7  
8 It was possible that the observed superiority of CD8<sup>+</sup> DC was due to the characteristics of  
9 the specific peptide recognised by the D78 hybridoma, and not generalizable to other  
10 peptides. To clarify this point, we sought to test the capacity of cDC subsets at presenting  
11 OVA to the OT-II hybridoma *in vitro*. Consistent with previous studies (34), incubation of  
12 CD4<sup>+</sup>, CD8<sup>+</sup> and DN DC with soluble OVA demonstrated a comparable capacity of all  
13 these DC to stimulate the OT-II hybridoma (Fig 5C). However, because the form of the  
14 antigen influences the effectiveness of its capture and processing by DC (34), and the  
15 malaria parasite antigen used to assess D78 responses *in vitro* in Fig 5A was cell-associated  
16 (i.e. from iRBC), we coated RBC from a naive B6 mouse with OVA in an attempt to  
17 provide this antigen to DC in a comparable, cell-associated fashion. Similar to the  
18 dominance of CD8<sup>+</sup> DC in presentation of iRBC malaria antigen to D78, these DC were  
19 the most efficient stimulators of the OT-II hybridoma when OVA-coated RBC were used  
20 (Fig 5D). CD4<sup>+</sup> DC were the least efficient DC subtype and DN DC exhibited an  
21 intermediate stimulatory capacity.

22

1 Together, these results indicate that CD8<sup>+</sup> DC have the highest capacity for stimulation of  
2 PbT-II T cells and suggest that this DC subset is particularly efficient at presenting MHC  
3 II-restricted antigens associated with RBC.

4

5 To validate the role of CD8<sup>+</sup> DC *in vivo*, we then took advantage of the PbT-II TCR  
6 transgenic mice, which enabled us to follow the response of adoptively transferred PbT-II  
7 T cells in mice lacking DC. Although DC are efficient APC capable of activating CD4<sup>+</sup> T  
8 cells, other cells can present antigen via MHC II and can therefore contribute to CD4<sup>+</sup> T  
9 cell priming (65). To assess the contribution of DC in the priming of PbT-II cells during  
10 PbA infection, we first reconstituted lethally-irradiated B6 mice with bone marrow from  
11 CD11c-DTR mice. In these chimeras, DC could be depleted by the administration of  
12 diphtheria toxin (DT) (46). Consistent with previous reports (9, 66), DT treatment of  
13 CD11cDTR->B6 chimeras during PbA infection resulted in the complete abrogation of  
14 PbT-II cell proliferation (Figs 6A and E), demonstrating an essential role of DC in CD4<sup>+</sup>  
15 T cell priming during blood stage infection. A similar result was obtained when DC were  
16 removed after *P. chabaudi* infection (Fig S3B).

17

18 To assess the role of individual DC subsets in the PbT-II response, we examined reactivity  
19 in mice deficient in subsets of DC due to the lack of specific transcription factors, namely  
20 Batf3 (43) or IRF8 (44). Batf3 deficient mice contain all DC subsets except CD8<sup>+</sup> DC and  
21 their migratory equivalents, the CD103<sup>+</sup> DC, and have been shown to sustain low CD8<sup>+</sup> T  
22 cell proliferation after PbA infection (67),(43). However, on a B6 background, some CD8<sup>+</sup>  
23 DC can be found in the LN of Batf3-deficient mice (68) and precursors capable of MHC



1 II-restricted presentation but not cross-presentation are found in the spleen (69). To  
2 examine the PbT-II response in Batf3-deficient mice, CTV-labelled PbT-II cells were  
3 adoptively transferred one day before infection with  $10^4$  PbA iRBC. PbT-II proliferation  
4 was then assessed 5 days later (Figs 6B and E). This showed that the total number of  
5 proliferating PbT-II cells was reduced in Batf3 deficient mice (Fig 6B), and pair-wise  
6 comparisons showed a 50% reduction relative to WT controls (Fig 6E). These findings  
7 indicated that PbT-II cells were heavily dependent upon mature  $CD8^+$  DC for antigen  
8 presentation, but suggested some participation by other DC, possibly the less mature form  
9 of  $CD8^+$  DC present in Batf3-deficient spleens (incapable of cross-presentation) or an  
10 alternative  $CD8^-$  DC subset.

11

12 IRF8-deficient mice are profoundly deficient in  $CD8^+$  DC,  $CD103^+$  DC and pDC, but  
13 contain other conventional DC subsets, so these mice represent an ideal host for assessing  
14 the role of  $CD8^-$  conventional DC in antigen presentation. CTV-labelled PbT-II cells were  
15 therefore adoptively transferred into IRF8-deficient mice 1 day before infection with PbA  
16 iRBC and T cell proliferation assessed 5 days later (Figs 6C and E). PbT-II proliferation  
17 was severely reduced in these mice (Fig 6C), amounting to about 20% of WT responses  
18 (Fig 6E), further supporting the major role for  $CD8^+$  DC in PbT-II responses.

19

20 Lack of IRF8 is known to result in immune defects in addition to the absence of  $CD8^+$  DC,  
21 e.g.  $CD8^-$  DC, although in normal numbers, are hypo-responsive to microbial stimulation  
22 (70). Also, IRF8 deficient mice show an excessive production of granulocytes resulting in  
23 splenomegaly (44), which could have hindered proper priming and proliferation of PbT-II

1 cells. Thus, to further explore the importance of CD8<sup>+</sup> DC in PbT-II priming to PbA, we  
2 assessed PbT-II proliferation in DT-treated XCR1-DTRvenus mice. XCR1 is a chemokine  
3 receptor expressed by mature CD8<sup>+</sup> DC and by their migratory CD103<sup>+</sup> counterparts, found  
4 in lymph nodes. DT treatment of XCR1-DTRvenus mice, which express the DT receptor  
5 under the XCR1 promoter, results in the elimination of CD8<sup>+</sup> DC from the spleen (45).  
6 Consistent with the results obtained using IRF8-deficient mice infected with blood stage  
7 PbA, PbT-II proliferation was significantly reduced in the spleen of DT-treated XCR1-  
8 DTRvenus mice, amounting to about 30% of WT controls (Figs 6D and E).

9

10 Together, these data demonstrated an essential role for DC in the generation of PbT-II cell  
11 responses to blood stage malaria parasites and argued that the CD8<sup>+</sup> DC subtype played a  
12 dominant role.

13

#### 14 **CD8<sup>+</sup> DC influence Th1 and Tfh induction**

15

16 DC subsets can influence the expression of transcription factors by T cells and drive their  
17 differentiation into particular T helper phenotypes (35, 36, 71-73). To address the role of  
18 CD8<sup>+</sup> DC on the differentiation of PbT-II cells after PbA infection, XCR1-DTRvenus mice  
19 were adoptively transferred with PbT-II cells and then infected with 10<sup>4</sup> PbA iRBC. These  
20 mice were either treated with DT throughout the infection to remove CD8<sup>+</sup> DC or given  
21 PBS, maintaining this DC subset. On day 7, the expression of transcription factors that  
22 define Th1, Th2, Th17, Tfh and Treg subsets (i.e. Tbet, GATA3, ROR $\gamma$ t, Bcl6 and Foxp3  
23 respectively) was assessed in PbT-II cells revealing induction of Tbet<sup>+</sup> and Bcl6<sup>+</sup> PbT-II

1 cells, which was impaired upon depletion of CD8<sup>+</sup> DC (Fig 6F and S3C). No expression  
2 of GATA3, ROR $\gamma$ t or Foxp3 was detected in PbT-II cells, even in the presence of CD8<sup>+</sup>  
3 DC. A similar dependence on CD8<sup>+</sup> DC for Th1 and Tfh cell development was observed  
4 for endogenous CD4<sup>+</sup> T cells (Fig 6F). Of note, and agreeing with a previous study (73),  
5 the proportion of Tbet<sup>+</sup> CD8<sup>+</sup> T cells was also markedly reduced in mice depleted of CD8<sup>+</sup>  
6 DC. These results suggested a major role for CD8<sup>+</sup> DC in promoting Tbet expression in  
7 CD4 and CD8 T cells, and a lower, but significant contribution to the generation of Tfh  
8 cells.

9

#### 10 **CD8<sup>+</sup> DC function early after infection is essential for ECM development**

11

12 *In vitro* experiments involving the use of transgenic parasites expressing model antigens  
13 previously showed that CD8<sup>+</sup> T cell priming during blood stage malaria parasite infection  
14 is efficiently performed by CD8<sup>+</sup> DC, but only poorly by other DC subsets (9). To confirm  
15 this point *in vivo*, we transferred CD8<sup>+</sup> T cells from the PbT-I transgenic line into Batf3-  
16 deficient mice or XCR1-DTRvenus mice and then infected these mice with PbA. XCR1-  
17 DTRvenus mice were treated with DT from days -1 to 2 after infection to specifically  
18 remove CD8<sup>+</sup> DC. PbT-I proliferation was severely decreased in the absence of CD8<sup>+</sup> DC  
19 in both cases (Fig 7A and B), confirming the important role of this DC subtype in CD8<sup>+</sup> T  
20 cell activation during blood stage PbA infection.

21

22 To assess the role of CD8<sup>+</sup> DC in ECM, we first assessed ECM in Batf3-deficient mice  
23 after infection with 10<sup>4</sup> PbA iRBC (Fig 7C). In agreement with previous reports (67),

1 Batf3-deficient mice did not develop ECM, demonstrating an essential role for CD8<sup>+</sup> DC  
2 in promoting pathology. To obtain a precise indication of the temporal requirement for  
3 CD8<sup>+</sup> DC, we treated XCR1-DTR<sup>venus</sup> mice with DT during the early stages of PbA  
4 infection (days -1 to 2pi) and monitored for ECM. While non-depleted mice rapidly  
5 succumbed to ECM, DT-treated mice were largely protected (Fig 7D), despite harbouring  
6 similar levels of parasitaemia (Fig S4A). To determine whether CD8<sup>+</sup> DC function may  
7 be required during the effector phase of ECM, XCR1-DTR<sup>venus</sup> mice were infected with  
8 PbA and treated with DT from day 5 post-infection (Fig 7E). In contrast to mice depleted  
9 of DC from the beginning of infection, all mice depleted just prior to ECM onset showed  
10 rapid disease onset supporting the view that CD8<sup>+</sup> DC were essential for the priming but  
11 not the effector phase of ECM.

12

### 13 **CD4<sup>+</sup> T cell help acting on CD8<sup>+</sup> DC is required for CD8<sup>+</sup> T cell priming during blood** 14 **stage PbA infection**

15

16 Primary CD8<sup>+</sup> T cell responses can be CD4<sup>+</sup> T cell dependent (18) or independent (19-21).  
17 To study the relevance of CD4<sup>+</sup> T cell help during blood stage malaria, we looked at the  
18 expansion of CD8<sup>+</sup> PbT-I cells in the absence of CD4<sup>+</sup> T cells. We transferred 1 million  
19 CTV-labelled PbT-I cells into MHC II-deficient mice, devoid of CD4<sup>+</sup> T cells, and infected  
20 them with 10<sup>4</sup> PbA iRBC. PbT-I proliferation 5 days later was significantly reduced in  
21 MHC II-deficient mice compared with their WT counterparts (Fig 8A). Because elevated  
22 numbers of CD8<sup>+</sup> T cell precursors can reduce helper requirements (74), transfer of a high  
23 number of PbT-I cells (1 million per mouse) in the previous experiment might have resulted

1 in an artificial enhancement of T cell proliferation in the mice lacking CD4 T cells. To  
2 clarify this point, we transferred lower numbers of PbT-I cells ( $10^5$ ,  $10^4$ ) into MHC II-  
3 deficient mice, infected them with  $10^4$  PbA iRBC and examined proliferation on day 5.  
4 This revealed that for this infection model, the response of PbT-I cells was similarly  
5 reduced in MHC II-deficient mice compared with WT counterparts regardless of the initial  
6 number of PbT-I cells transferred (Fig 8B).

7

8 Since signals derived from parasite material can promote DC licensing (22), we reasoned  
9 that infection with higher numbers of parasites might result in a decreased need for CD4<sup>+</sup>  
10 T cell help. To examine this issue, mice depleted of CD4<sup>+</sup> T cells with the monoclonal  
11 antibody GK1.5 (as an alternative to MHC II-deficient mice), were adoptively transferred  
12 with  $10^6$  CTV-labelled PbT-I cells and then infected with  $10^4$ ,  $10^5$  or  $10^6$  PbA iRBC. While  
13 numbers of divided PbT-I cells were significantly reduced in CD4<sup>+</sup> T cell depleted mice  
14 compared with non-depleted controls for all parasite doses, the proportional difference was  
15 largest for the lower doses (Fig 8C). This indicated that the requirement for help during  
16 blood stage infection with PbA was somewhat affected by the infection dose.

17

18 Licensing of DC for CTL immunity requires the interaction of co-stimulatory molecules  
19 between activated CD4<sup>+</sup> T cells and DC. CD40L (on the CD4<sup>+</sup> T cell) and CD40 (on the  
20 DC) have been shown to mediate DC licensing in several infectious and non-infectious  
21 settings (75-77). To determine whether this pathway was relevant for the provision of help  
22 by CD4<sup>+</sup> T cells during blood stage PbA infection, we transferred PbT-I cells into either  
23 mice lacking CD40 or CD40L and infected them with  $10^4$  iRBC. PbT-I proliferation and

1 total numbers were significantly reduced in the spleens of both CD40-deficient and  
2 CD40L-deficient mice relative to WT controls (Fig 8D). Taken together, the results  
3 demonstrated a need for CD4<sup>+</sup> T cells and CD40-CD40L interactions for the development  
4 of optimal CD8<sup>+</sup> T cell responses during infection with blood stage malaria.

5

6 To demonstrate that CD4<sup>+</sup> T cells provide help via CD40-CD40L interactions to promote  
7 optimal CD8<sup>+</sup> T cell activation during blood stage PbA infection, we adoptively transferred  
8 10<sup>6</sup> WT PbT-II cells together with 10<sup>6</sup> PbT-I cells into CD40L-deficient mice (in which  
9 endogenous CD4<sup>+</sup> T cells were unable to license DC) and then infected these mice with  
10 10<sup>4</sup> iRBC. While PbT-I proliferation was reduced in CD40L-deficient mice, their response  
11 was recovered to WT levels in mice that received PbT-II cells (Fig 8E). To assess the  
12 capacity of PbT-II cells to help CD8<sup>+</sup> T cells cause ECM, we examined the influence of  
13 PbT-II cells on the onset of ECM in CD40L-deficient mice. While CD40L-deficient mice  
14 showed a significant delay in ECM onset compared to WT mice, this delay was alleviated  
15 by transfer of PbT-II cells (Fig 8F). Changes in the time frame for ECM development were  
16 independent of parasitaemia, which was not significantly altered by the adoptive transfer  
17 of PbT-II cells (Fig S4B). Taken together, these results showed that PbT-II cells were able  
18 to help CD8<sup>+</sup> T cells proliferate and cause ECM in CD40L-deficient mice.

19

20 In summary, our results indicate that CD8<sup>+</sup> DC are the main APC priming both CD4<sup>+</sup> and  
21 CD8<sup>+</sup> T cells during infection with blood stage PbA parasites. Using our newly generated  
22 PbT-II transgenic cell line, we demonstrated that optimal expansion of CD8<sup>+</sup> T cells  
23 required CD4<sup>+</sup> T cell help, which was provided to the DC via CD40-CD40L interactions.

## 1 **Discussion**

2 While TCR transgenic mouse lines are very useful for deciphering the mechanisms by  
3 which T cells operate and carry out their functions in different contexts of infection, the  
4 available range of these lines specific for blood stage malaria antigens is limited. Here we  
5 introduce a new CD4<sup>+</sup> T cell transgenic mouse line, termed PbT-II, specific for a broad  
6 range of *Plasmodium* species and responsive to both blood stage and pre-erythrocytic stage  
7 infections, offering wide applicability for the study of CD4<sup>+</sup> T cell function in multiple  
8 malaria models. To date, the only available CD4<sup>+</sup> T cell receptor transgenic murine line  
9 specific for malaria parasites (*P. chabaudi*) was B5, which is restricted for I-E<sup>d</sup> and  
10 therefore only usable in the BALB/c background. The PbT-II mice provide the opportunity  
11 to analyse *Plasmodium*-specific CD4<sup>+</sup> T cells on the B6 background, for which availability  
12 of reagents and gene deficient mice is much broader. We show here that PbT-II cells are  
13 an excellent tool for studying CD4<sup>+</sup> T cell function in the context of malaria immunity or  
14 pathology. When adoptively transferred into CD40L-deficient mice, in which endogenous  
15 CD4<sup>+</sup> T cells are unable to fully activate B cells or DC (48, 75, 77), PbT-II cells were able  
16 to replace endogenous CD4<sup>+</sup> T cells for the generation of both antibody responses, which  
17 allowed control of *P. chabaudi* parasitaemia, and CD8<sup>+</sup> T cell responses, which caused  
18 ECM after PbA infection. This indicates that PbT-II cells are an invaluable tool for the  
19 study of CD4<sup>+</sup> T cell biology during infection with *Plasmodium* parasites.

20

21 The specific antigen recognised by PbT-II cells is yet to be defined. The broad cross-  
22 reactivity to different *Plasmodium* species suggests that the target epitope belongs to a  
23 conserved protein, likely to have an essential function in blood stage parasites. The PbT-II

1 target protein is also expressed during the pre-erythrocytic stage, as PbT-II cells also  
2 responded to RAS. It is possible that this protein is only expressed late during the liver  
3 stage, shortly before merozoites are released to the blood (78), allowing for a small window  
4 of antigen presentation during the liver stage of the parasite. However, the limited  
5 development of RAS within hepatocytes argues against this possibility. Alternatively, the  
6 abundance of this protein during the liver stage of the parasite cycle may be lower than  
7 during the blood stage. Further studies will be required to determine the exact antigen  
8 recognized by PbT-II cells.

9

10 DC are extremely efficient at initiating T cell responses in numerous infection models. We  
11 have been able to demonstrate a pivotal role for the CD8<sup>+</sup> DC subset in the priming of both  
12 CD4<sup>+</sup> and CD8<sup>+</sup> T cells during blood stage PbA infection. Our results on CD8<sup>+</sup> T cell  
13 activation confirm previous *ex vivo* data showing a superior efficiency of CD8<sup>+</sup> DC at  
14 priming OT-I cells after exposure to transgenic PbA parasites expressing SIINFEKL (9).  
15 They are also consistent with *in vivo* studies showing a reduced number of activated  
16 endogenous CD8<sup>+</sup> T cells after PbA infection of mice deficient in CD8<sup>+</sup> DC (37, 38, 67).  
17 As CD8<sup>+</sup> DC possess specialised machinery for cross-presentation (34), this likely  
18 underlies their unique capacity to prime CD8<sup>+</sup> T cells during infection by *Plasmodium*  
19 species.

20

21 CD8<sup>+</sup> DC were also the main subset that stimulated D78 and PbT-II cells. To estimate the  
22 net contribution of the different DC subsets to MHC II presentation, the results obtained  
23 for D78 stimulation *ex vivo* (Fig 5B), which show that CD8<sup>+</sup> DC are about 10-fold better



1 than CD4<sup>+</sup> DC or DN DC at presentation, were adjusted to reflect the distinct abundance  
2 of sorted DC subsets in the spleen (CD4<sup>+</sup> DC, 55.1%; CD8<sup>+</sup> DC, 17.7%; DN DC, 13.4%  
3 of splenic CD11c<sup>hi</sup> MHC II<sup>hi</sup> cells). From this adjustment, we estimated that the  
4 contribution of CD8<sup>+</sup> DC to antigen presentation via MHC II was 67% of the total, whereas  
5 that of CD4<sup>+</sup> DC contributed 20% and DN DC contributed the remaining 13% (with the  
6 combined CD8<sup>-</sup> DC subsets therefore contributing 33% of the total antigen presentation in  
7 the spleen). *In vivo* experiments using different mouse lines deficient in CD8<sup>+</sup> DC to assess  
8 the contribution of CD8<sup>+</sup> DC to PbT-II priming during blood stage PbA infection supported  
9 our observations with the D78 hybridoma: the number of dividing PbT-II cells in the spleen  
10 of Batf3-deficient or IRF8-deficient or DT-treated XCR1-DTRvenus mice was reduced to  
11 45.1%, 16.6% and 31.0%, respectively. Because of the limitations of Batf3-deficient and  
12 IRF8-deficient mice in this system, with Batf3-deficient mice still containing immature DC  
13 capable of MHC II presentation (68, 69), and IRF8-deficient mice presenting additional  
14 immune defects (44, 70), the outcome using XCR1-DTRvenus mice likely best represents  
15 the net contribution of CD8<sup>+</sup> DC to MHC II presentation. This value (69%) very closely  
16 aligns with the 67% contribution to MHC II presentation estimated using the D78  
17 hybridoma.

18

19 These results clearly define CD8<sup>+</sup> DC as the major APC contributing to CD4<sup>+</sup> T cell  
20 priming during PbA infection. Previous work in our lab showed roughly equivalent CD4<sup>+</sup>  
21 T cell priming *ex vivo* by CD8<sup>-</sup> and CD8<sup>+</sup> DC from BALB/c mice infected with a transgenic  
22 PbA parasite expressing various model T cell epitopes (9). In that case, responses in B6  
23 mice could not be assessed because they were too weak (9). Consistent with our current

1 study, other reports have found an important role for CD8<sup>+</sup> DC in CD4<sup>+</sup> T cell activation:  
2 Clec9A-DTR mice depleted of CD8<sup>+</sup> DC by injection of DT showed a markedly decreased  
3 activation of endogenous CD4<sup>+</sup> T cells during PbA infection (37). Also, CD8<sup>+</sup> DC were  
4 more efficient than CD8<sup>-</sup> DC at presenting *P. chabaudi*-derived antigens to CD4<sup>+</sup> T cell  
5 hybridomas (39). In the latter study, the superiority of CD8<sup>+</sup> DC was only observed for DC  
6 derived from uninfected mice, and CD8<sup>-</sup> DC extracted on day 7 after infection were more  
7 efficient at MHC II presentation than CD8<sup>+</sup> DC. At that late time point, CD8<sup>+</sup> DC showed  
8 greater cell death than CD8<sup>-</sup> DC, which likely explained their decreased stimulatory  
9 capacity (39).

10

11 We also provided evidence that CD8<sup>+</sup> DC contribute to the quantity of the T cell response,  
12 as CD8<sup>+</sup> DC depletion led to the generation of reduced frequencies of Th1 and Tfh cells.  
13 This agrees with existing literature showing that the CD8<sup>+</sup> DC subset preferentially  
14 generates Th1 responses over Th2 responses (35, 36) and is efficient at promoting Tfh  
15 immunity (71, 72). The consequences of this functional capacity for CD8<sup>+</sup> DC, however,  
16 are likely to differ depending on the model studied. During PbA infection, for example,  
17 IFN- $\gamma$  producing CD4<sup>+</sup> T cells have been implicated in ECM by attracting CD8<sup>+</sup> T cells to  
18 the brain (79). Thus, loss of Th1 cell development after CD8<sup>+</sup> DC depletion may impact  
19 CD8<sup>+</sup> T cell recruitment to this organ; however, in this example CD8<sup>+</sup> DC would also be  
20 crucial for initiation of CD8<sup>+</sup> T cell responses. Alternatively, control of *P. chabaudi*  
21 infection requires Th1 cells during the first peak of parasitemia (80) and Tfh cells for  
22 complete elimination of the parasite (81). Not surprisingly, the absence of CD8<sup>+</sup> DC in  
23 this infection results in impaired parasite control and more pronounced relapses (40).

1

2 The reason for the observed dominance of CD8<sup>+</sup> DC in MHC II presentation remains  
3 unclear. The form of antigen encountered by DC appears to play a role, as in the present  
4 work CD8<sup>+</sup> DC only out-performed other DC subsets when antigen was provided in a RBC-  
5 associated form, but not when in soluble form (Figs 5C and D). This is consistent with their  
6 specialization in the capture of cell-associated antigen (82). Further studies are required to  
7 elucidate the mechanisms underlying the superiority of CD8<sup>+</sup> DC in MHC II presentation  
8 during PbA infection.

9

10 Given the critical role of CD8<sup>+</sup> T cells in the development of ECM (83), determining the  
11 requirements for CD8<sup>+</sup> T cell activation during blood stage malaria is of great importance.  
12 Conventional DC are essential for the induction of ECM (66) and lack of ECM in XCR1-  
13 DTRvenus mice treated with DT early in infection confirms the findings of others (37) that  
14 implicate CD8<sup>+</sup> DC in this process. This is not surprising given their central role in priming  
15 both CD4<sup>+</sup> and CD8<sup>+</sup> T cells. Less clear is the extent at which CD4<sup>+</sup> T cell licensing of  
16 CD8<sup>+</sup> DC is required for ECM development. Several studies have shown that anti-CD4<sup>+</sup>  
17 antibody given around the time of PbA infection prevents ECM (26-30), consistent with  
18 the view that CD4<sup>+</sup> T cell help is required for the induction of CTL responses. However,  
19 CD4<sup>+</sup> T cells have also been implicated in CD8<sup>+</sup> T cell recruitment to the brain, thus raising  
20 the possibility that their depletion merely affects this facet of disease. Only one study  
21 provides direct evidence for a contribution of CD4<sup>+</sup> T cell help to CD8<sup>+</sup> T cell proliferation,  
22 where CD4<sup>+</sup> T cell depletion resulted in low proliferation of OVA-specific OT-I cells after  
23 infection with transgenic PbA parasites expressing the OVA epitope (31). By using our

1 PbT-I transgenic CD8<sup>+</sup> T cells, we clearly demonstrated that CD4<sup>+</sup> T cell help was essential  
2 for optimal CD8<sup>+</sup> T cell expansion, as mice depleted of CD4<sup>+</sup> T cells showed suboptimal  
3 PbT-I proliferation. These responses were dependent on CD8<sup>+</sup> DC, as they were impaired  
4 when this subset of DC were depleted. Furthermore, they depended heavily upon CD40L,  
5 as mice deficient in this molecule had curtailed CD8<sup>+</sup> T cell proliferation. The capacity of  
6 transferred PbT-II cells to help PbT-I cells to proliferate in CD40L-deficient mice further  
7 implicated CD40L as an important component of help that could be provided by PbT-II T  
8 cells. Interestingly, CD40 signalling was not absolutely essential for ECM development,  
9 as CD40L-deficient mice eventually developed ECM in the absence of added PbT-II T  
10 cells, though with a delayed kinetics. This contrasts a previous report that found CD40L-  
11 deficient mice were resistant to ECM (84), an observation that may be explained by  
12 differences in animal housing facilities, potentially microbiota, known to affect ECM (85).  
13

14 Our work extends earlier findings by determining that CD4<sup>+</sup> T cell help is required for  
15 optimal CD8<sup>+</sup> T cell expansion after infection with different doses of parasites, and is  
16 relatively independent of the initial CD8<sup>+</sup> T cell precursor frequency. By defining CD40  
17 signalling as an important event in DC licensing in this model, we have also identified a  
18 key checkpoint that could be targeted to limit pathogenic CD8<sup>+</sup> T cell immunity to blood  
19 stage disease.

20

21 We have established that CD8<sup>+</sup> DC are the main APC for CD4<sup>+</sup> and CD8<sup>+</sup> T cell priming,  
22 and that CD8<sup>+</sup> T cell priming required CD4<sup>+</sup> T cell help. It is likely that CD8<sup>+</sup> DC are  
23 licensed by those CD4<sup>+</sup> T cells that they prime, though CD4<sup>+</sup> T cells primed on CD8<sup>-</sup> DC

1 may also contribute to this process. The essential role for CD8<sup>+</sup> DC in CD8<sup>+</sup> T cell priming  
2 and their dominant role in CD4<sup>+</sup> T cell priming puts this subset at the centre of response  
3 initiation to blood stage malaria parasites and suggests that strategies aimed at generating  
4 T cell responses against blood stage malaria parasites will benefit from exploiting this DC  
5 subtype. The findings that individuals with severe disease in malaria endemic areas present  
6 with increased numbers of circulating BDCA3<sup>+</sup> DC (86) (the human equivalent to mouse  
7 CD8<sup>+</sup> DC) and activated CD8<sup>+</sup> T cells (38) relative to those with mild malaria, suggest that  
8 CD8<sup>+</sup> T cell activation during blood stage malaria may be driven by a similar process in  
9 humans as in the mouse model. More precise knowledge of the mechanisms that drive  
10 CD8<sup>+</sup> DC function during malarial infections may, thus, allow us to develop more effective  
11 strategies to combat this disease.

12

## 1   **References**

2

3   1. World Health Organization. 2015. World malaria report 2015. 1–157.

4   2. Carvalho, L. H., G.-I. Sano, J. C. R. Hafalla, A. Morrot, M. A. Curotto de Lafaille, and  
5   F. Zavala. 2002. IL-4-secreting CD4<sup>+</sup> T cells are crucial to the development of CD8<sup>+</sup> T-  
6   cell responses against malaria liver stages. *Nat Med* 8: 166–170.

7   3. Krishnegowda, G., A. M. Hajjar, J. Zhu, E. J. Douglass, S. Uematsu, S. Akira, A. S.  
8   Woods, and D. C. Gowda. 2005. Induction of proinflammatory responses in macrophages  
9   by the glycosylphosphatidylinositols of *Plasmodium falciparum*: cell signaling receptors,  
10   glycosylphosphatidylinositol (GPI) structural requirement, and regulation of GPI activity.  
11   *J. Biol. Chem.* 280: 8606–8616.

12   4. Overstreet, M. G., Y.-C. Chen, I. A. Cockburn, S.-W. Tse, and F. Zavala. 2011. CD4<sup>+</sup>  
13   T Cells Modulate Expansion and Survival but Not Functional Properties of Effector and  
14   Memory CD8<sup>+</sup> T Cells Induced by Malaria Sporozoites. *PLoS ONE* 6: e15948.

15   5. Craig, A. G., G. E. Grau, C. Janse, J. W. Kazura, D. Milner, J. W. Barnwell, G. Turner,  
16   J. Langhorne, on behalf of the participants of the Hinxton Retreat meeting on “Animal  
17   Models for Research on Severe Malaria.” 2012. The Role of Animal Models for Research  
18   on Severe Malaria. *PLoS Pathog* 8: e1002401.

19   6. González-Aseguinolaza, G., C. de Oliveira, M. Tomaska, S. Hong, O. Bruña-Romero,  
20   T. Nakayama, M. Taniguchi, A. Bendelac, L. Van Kaer, Y. Koezuka, and M. Tsuji. 2000.  
21   alpha -galactosylceramide-activated Valpha 14 natural killer T cells mediate protection  
22   against murine malaria. *Proc. Natl. Acad. Sci. U.S.A.* 97: 8461–8466.

23   7. Coban, C., K. J. Ishii, T. Kawai, H. Hemmi, S. Sato, S. Uematsu, M. Yamamoto, O.

- 1 Takeuchi, S. Itagaki, N. Kumar, T. Horii, and S. Akira. 2005. Toll-like receptor 9  
2 mediates innate immune activation by the malaria pigment hemozoin. *J. Exp. Med.* 201:  
3 19–25.
- 4 8. ROMERO, J. F., G. Eberl, H. R. MacDonald, and G. Corradin. 2001. CD1d-restricted  
5 NK T cells are dispensable for specific antibody responses and protective immunity  
6 against liver stage malaria infection in mice. *Parasite Immunol.* 23: 267–269.
- 7 9. Lundie, R. J., T. F. de Koning-Ward, G. M. Davey, C. Q. Nie, D. S. Hansen, L. S. Lau,  
8 J. D. Mintern, G. T. Belz, L. Schofield, F. R. Carbone, J. A. Villadangos, B. S. Crabb,  
9 and W. R. Heath. 2008. Blood-stage Plasmodium infection induces CD8+ T lymphocytes  
10 to parasite-expressed antigens, largely regulated by CD8alpha+ dendritic cells.  
11 *Proceedings of the National Academy of Sciences* 105: 14509–14514.
- 12 10. Miyakoda, M., D. Kimura, M. Yuda, Y. Chinzei, Y. Shibata, K. Honma, and K. Yui.  
13 2008. Malaria-specific and nonspecific activation of CD8+ T cells during blood stage of  
14 Plasmodium berghei infection. *The Journal of Immunology* 181: 1420–1428.
- 15 11. Korten, S., R. J. Anderson, C. M. Hannan, E. G. Sheu, R. Sinden, S. Gadola, M.  
16 Taniguchi, and A. V. S. Hill. 2005. Invariant V 14 Chain NKT Cells Promote  
17 Plasmodium berghei Circumsporozoite Protein-Specific Gamma Interferon- and Tumor  
18 Necrosis Factor Alpha-Producing CD8+ T Cells in the Liver after Poxvirus Vaccination  
19 of Mice. *Infection and Immunity* 73: 849–858.
- 20 12. Lundie, R. J., L. J. Young, G. M. Davey, J. A. Villadangos, F. R. Carbone, W. R.  
21 Heath, and B. S. Crabb. 2010. Blood-stage Plasmodium berghei infection leads to short-  
22 lived parasite-associated antigen presentation by dendritic cells. *Eur. J. Immunol.* 40:  
23 1674–1681.

- 1 13. HAQUE, A., S. E. Best, K. Unosson, F. H. Amante, F. de Labastida, N. M. Anstey,  
2 G. Karupiah, M. J. Smyth, W. R. Heath, and C. R. Engwerda. 2011. Granzyme B  
3 Expression by CD8<sup>+</sup> T Cells Is Required for the Development of Experimental Cerebral  
4 Malaria. *The Journal of Immunology* 186: 6148–6156.
- 5 14. Gonzalez-Aseguinolaza, G., L. Van Kaer, C. C. Bergmann, J. M. Wilson, J. Schmiegl,  
6 M. Kronenberg, T. Nakayama, M. Taniguchi, Y. Koezuka, and M. Tsuji. 2002. Natural  
7 killer T cell ligand alpha-galactosylceramide enhances protective immunity induced by  
8 malaria vaccines. *J. Exp. Med.* 195: 617–624.
- 9 15. Miyakoda, M., D. Kimura, K. Honma, K. Kimura, M. Yuda, and K. Yui. 2012.  
10 Development of Memory CD8<sup>+</sup> T Cells and Their Recall Responses during Blood-Stage  
11 Infection with *Plasmodium berghei* ANKA. *The Journal of Immunology*.
- 12 16. Lau, L. S., D. Fernandez Ruiz, V. Mollard, A. Sturm, M. A. Neller, A. Cozijnsen, J.  
13 L. Gregory, G. M. Davey, C. M. Jones, Y.-H. Lin, A. Haque, C. R. Engwerda, C. Q. Nie,  
14 D. S. Hansen, K. M. Murphy, A. T. Papenfuss, J. J. Miles, S. R. Burrows, T. de Koning-  
15 Ward, G. I. McFadden, F. R. Carbone, B. S. Crabb, and W. R. Heath. 2014. CD8<sup>+</sup> T  
16 Cells from a Novel T Cell Receptor Transgenic Mouse Induce Liver-Stage Immunity  
17 That Can Be Boosted by Blood-Stage Infection in Rodent Malaria. *PLoS Pathog* 10:  
18 e1004135.
- 19 17. Stephens, R., F. R. Albano, S. Quin, B. J. Pascal, V. Harrison, B. Stockinger, D.  
20 Kioussis, H.-U. Weltzien, and J. Langhorne. 2005. Malaria-specific transgenic CD4(+) T  
21 cells protect immunodeficient mice from lethal infection and demonstrate requirement for  
22 a protective threshold of antibody production for parasite clearance. *Blood* 106: 1676–  
23 1684.



- 1 18. Smith, C. M., N. S. Wilson, J. Waithman, J. A. Villadangos, F. R. Carbone, W. R.  
2 Heath, and G. T. Belz. 2004. Cognate CD4+ T cell licensing of dendritic cells in CD8+ T  
3 cell immunity. *Nat. Immunol.* 5: 1143–1148.
- 4 19. Belz, G. T., D. Wodarz, G. Diaz, M. A. Nowak, and P. C. Doherty. 2002.  
5 Compromised Influenza Virus-Specific CD8+-T-Cell Memory in CD4+-T-Cell-Deficient  
6 Mice. *Journal of Virology* 76: 12388–12393.
- 7 20. Matloubian, M., R. J. Concepcion, and R. Ahmed. 1994. CD4+ T cells are required to  
8 sustain CD8+ cytotoxic T-cell responses during chronic viral infection. *Journal of*  
9 *Virology* 68: 8056–8063.
- 10 21. Sun, J. C., and M. J. Bevan. 2003. Defective CD8 T cell memory following acute  
11 infection without CD4 T cell help. *Science* 300: 339–342.
- 12 22. Bachmann, M. F., R. M. Zinkernagel, and A. Oxenius. 1998. Immune responses in  
13 the absence of costimulation: viruses know the trick. *J. Immunol.* 161: 5791–5794.
- 14 23. Schmieg, J., G. Gonzalez-Aseguinolaza, and M. Tsuji. 2003. The role of natural killer  
15 T cells and other T cell subsets against infection by the pre-erythrocytic stages of malaria  
16 parasites. *Microbes Infect.* 5: 499–506.
- 17 24. Le Bon, A., N. Etchart, C. Rossmann, M. Ashton, S. Hou, D. Gewert, P. Borrow, and  
18 D. F. Tough. 2003. Cross-priming of CD8+ T cells stimulated by virus-induced type I  
19 interferon. *Nat. Immunol.* 4: 1009–1015.
- 20 25. Schofield, L., and G. E. Grau. 2005. Immunological processes in malaria  
21 pathogenesis. *Nat Rev Immunol* 5: 722–735.
- 22 26. Grau, G. E., P. F. Piguet, H. D. Engers, J. A. Louis, P. Vassalli, and P. H. Lambert.  
23 1986. L3T4+ T lymphocytes play a major role in the pathogenesis of murine cerebral

- 1 malaria. *J. Immunol.* 137: 2348–2354.
- 2 27. Yañez, D. M., D. D. Manning, A. J. Cooley, W. P. Weidanz, and H. C. van der  
3 Heyde. 1996. Participation of lymphocyte subpopulations in the pathogenesis of  
4 experimental murine cerebral malaria. *J. Immunol.* 157: 1620–1624.
- 5 28. Belnoue, E., M. Kayibanda, A. M. Vigário, J.-C. Deschemin, N. Van Rooijen, M.  
6 Viguier, G. Snounou, and L. Renia. 2002. On the pathogenic role of brain-sequestered  
7 alphabeta CD8+ T cells in experimental cerebral malaria. *J. Immunol.* 169: 6369–6375.
- 8 29. Hermsen, C., T. van de Wiel, E. Mommers, R. Sauerwein, and W. Eling. 1997.  
9 Depletion of CD4+ or CD8+ T-cells prevents *Plasmodium berghei* induced cerebral  
10 malaria in end-stage disease. *Parasitology* 114 ( Pt 1): 7–12.
- 11 30. Waki, S., S. Uehara, K. Kanbe, K. Ono, M. Suzuki, and H. Nariuchi. 1992. The role  
12 of T cells in pathogenesis and protective immunity to murine malaria. *Immunology* 75:  
13 646–651.
- 14 31. Haque, A., S. E. Best, A. Ammerdorffer, L. Desbarrieres, M. M. de Oca, F. H.  
15 Amante, F. de Labastida Rivera, P. Hertzog, G. M. Boyle, G. R. Hill, and C. R.  
16 Engwerda. 2011. Type I interferons suppress CD4+ T-cell-dependent parasite control  
17 during blood-stage *Plasmodium* infection. *Eur. J. Immunol.* 41: 2688–2698.
- 18 32. Pulendran, B. 2015. The Varieties of Immunological Experience: Of Pathogens,  
19 Stress, and Dendritic Cells. *Annu. Rev. Immunol.* 33: 563–606.
- 20 33. Haan, den, J. M., S. M. Lehar, and M. J. Bevan. 2000. CD8(+) but not CD8(-)  
21 dendritic cells cross-prime cytotoxic T cells in vivo. *J. Exp. Med.* 192: 1685–1696.
- 22 34. Schnorrer, P., G. M. N. Behrens, N. S. Wilson, J. L. Pooley, C. M. Smith, D. El-  
23 Sukkari, G. Davey, F. Kupresanin, M. Li, E. Maraskovsky, G. T. Belz, F. R. Carbone, K.

- 1 Shortman, W. R. Heath, and J. A. Villadangos. 2006. The dominant role of CD8+  
2 dendritic cells in cross-presentation is not dictated by antigen capture. *Proc. Natl. Acad.*  
3 *Sci. U.S.A.* 103: 10729–10734.
- 4 35. Pulendran, B., J. L. Smith, G. Caspary, K. Brasel, D. Pettit, E. Maraskovsky, and C.  
5 R. Maliszewski. 1999. Distinct dendritic cell subsets differentially regulate the class of  
6 immune response in vivo. *Proc. Natl. Acad. Sci. U.S.A.* 96: 1036–1041.
- 7 36. Maldonado-López, R., T. De Smedt, P. Michel, J. Godfroid, B. Pajak, C. Heirman, K.  
8 Thielemans, O. Leo, J. Urbain, and M. Moser. 1999. CD8alpha+ and CD8alpha-  
9 subclasses of dendritic cells direct the development of distinct T helper cells in vivo. *J.*  
10 *Exp. Med.* 189: 587–592.
- 11 37. Piva, L., P. Tetlak, C. Claser, K. Karjalainen, L. RÉNIA, and C. Ruedl. 2012. Cutting  
12 Edge: Clec9A+ Dendritic Cells Mediate the Development of Experimental Cerebral  
13 Malaria. *The Journal of Immunology*.
- 14 38. Guermonprez, P., J. Helft, C. Claser, S. Deroubaix, H. Karanje, A. Gazumyan, G.  
15 Darasse-Jèze, S. B. Telerman, G. Breton, H. A. Schreiber, N. Frias-Staheli, E. Billerbeck,  
16 M. Dorner, C. M. Rice, A. Ploss, F. Klein, M. Swiecki, M. Colonna, A. O. Kamphorst,  
17 M. Meredith, R. Niec, C. Takacs, F. Mikhail, A. Hari, D. Bosque, T. Eisenreich, M.  
18 Merad, Y. Shi, F. Ginhoux, L. Renia, B. C. Urban, and M. C. Nussenzweig. 2013.  
19 Inflammatory Flt3l is essential to mobilize dendritic cells and for T cell responses during  
20 Plasmodium infection. *Nat Med* 19: 730–738.
- 21 39. Sponaas, A.-M., E. T. Cadman, C. Voisine, V. Harrison, A. Boonstra, A. O'Garra,  
22 and J. Langhorne. 2006. Malaria infection changes the ability of splenic dendritic cell  
23 populations to stimulate antigen-specific T cells. *J. Exp. Med.* 203: 1427–1433.

- 1 40. Turcotte, K., S. Gauthier, D. Malo, M. Tam, M. M. Stevenson, and P. Gros. 2007.  
2 Icsbp1/IRF-8 Is Required for Innate and Adaptive Immune Responses against  
3 Intracellular Pathogens. *The Journal of Immunology* 179: 2467–2476.
- 4 41. Vugmeyster, Y., R. Glas, B. Pérarnau, F. A. Lemonnier, H. Eisen, and H. Ploegh.  
5 1998. Major histocompatibility complex (MHC) class I KbDb  $-/-$  deficient mice possess  
6 functional CD8<sup>+</sup> T cells and natural killer cells. *Proc. Natl. Acad. Sci. U.S.A.* 95: 12492–  
7 12497.
- 8 42. Madsen, L., N. Labrecque, J. Engberg, A. Dierich, A. Svejgaard, C. Benoist, D.  
9 Mathis, and L. Fugger. 1999. Mice lacking all conventional MHC class II genes. *Proc.*  
10 *Natl. Acad. Sci. U.S.A.* 96: 10338–10343.
- 11 43. Hildner, K., B. T. Edelson, W. E. Purtha, M. Diamond, H. Matsushita, M. Kohyama,  
12 B. Calderon, B. U. Schraml, E. R. Unanue, M. S. Diamond, R. D. Schreiber, T. L.  
13 Murphy, and K. M. Murphy. 2008. Batf3 deficiency reveals a critical role for CD8 $\alpha$ <sup>+</sup>  
14 dendritic cells in cytotoxic T cell immunity. *Science* 322: 1097–1100.
- 15 44. Holtshcke, T., J. Löhler, Y. Kanno, T. Fehr, N. Giese, F. Rosenbauer, J. Lou, K. P.  
16 Knobeloch, L. Gabriele, J. F. Waring, M. F. Bachmann, R. M. Zinkernagel, H. C. Morse,  
17 K. Ozato, and I. Horak. 1996. Immunodeficiency and chronic myelogenous leukemia-like  
18 syndrome in mice with a targeted mutation of the ICSBP gene. *Cell* 87: 307–317.
- 19 45. Yamazaki, C., M. Sugiyama, T. Ohta, H. Hemmi, E. Hamada, I. Sasaki, Y. Fukuda,  
20 T. Yano, M. Nobuoka, T. Hirashima, A. Iizuka, K. Sato, T. Tanaka, K. Hoshino, and T.  
21 Kaisho. 2013. Critical Roles of a Dendritic Cell Subset Expressing a Chemokine  
22 Receptor, XCR1. *The Journal of Immunology* 190: 6071–6082.
- 23 46. Jung, S., D. Unutmaz, P. Wong, G.-I. Sano, K. De los Santos, T. Sparwasser, S. Wu,

- 1 S. Vuthoori, K. Ko, F. Zavala, E. G. Pamer, D. R. Littman, and R. A. Lang. 2002. In vivo  
2 depletion of CD11c<sup>+</sup> dendritic cells abrogates priming of CD8<sup>+</sup> T cells by exogenous  
3 cell-associated antigens. *Immunity* 17: 211–220.
- 4 47. Kawabe, T., T. Naka, K. Yoshida, T. Tanaka, H. Fujiwara, S. Suematsu, N. Yoshida,  
5 T. Kishimoto, and H. Kikutani. 1994. The immune responses in CD40-deficient mice:  
6 impaired immunoglobulin class switching and germinal center formation. *Immunity* 1:  
7 167–178.
- 8 48. Xu, J., T. M. Foy, J. D. Laman, E. A. Elliott, J. J. Dunn, T. J. Waldschmidt, J.  
9 Elsemore, R. J. Noelle, and R. A. Flavell. 1994. Mice deficient for the CD40 ligand.  
10 *Immunity* 1: 423–431.
- 11 49. Barnden, M. J., J. Allison, W. R. Heath, and F. R. Carbone. 1998. Defective TCR  
12 expression in transgenic mice constructed using cDNA-based alpha- and beta-chain genes  
13 under the control of heterologous regulatory elements. *Immunol Cell Biol* 76: 34–40.
- 14 50. Bedoui, S., P. G. Whitney, J. Waithman, L. Eidsmo, L. Wakim, I. Caminschi, R. S.  
15 Allan, M. Wojtasiak, K. Shortman, F. R. Carbone, A. G. Brooks, and W. R. Heath. 2009.  
16 Cross-presentation of viral and self antigens by skin-derived CD103<sup>+</sup> dendritic cells. *Nat.*  
17 *Immunol.* 10: 488–495.
- 18 51. Benedict, M. Q. 1997. Care and maintenance of anopheline mosquito colonies. *The*  
19 *Molecular Biology of Insect Disease Vectors*.
- 20 52. Ramakrishnan, C., M. J. Delves, K. Lal, A. M. Blagborough, G. Butcher, K. W.  
21 Baker, and R. E. Sinden. 2012. Laboratory Maintenance of Rodent Malaria Parasites. In  
22 *Methods in Molecular Biology*. Methods in Molecular Biology vol. 923. Humana Press,  
23 Totowa, NJ. 51–72.

- 1 53. Lau, L. S., D. Fernandez Ruiz, G. M. Davey, T. F. de Koning-Ward, A. T. Papenfuss,  
2 F. R. Carbone, A. G. Brooks, B. S. Crabb, and W. R. Heath. 2011. Blood-Stage  
3 *Plasmodium berghei* Infection Generates a Potent, Specific CD8<sup>+</sup> T-Cell Response  
4 Despite Residence Largely in Cells Lacking MHC I Processing Machinery. *Journal of*  
5 *Infectious Diseases* 204: 1989–1996.
- 6 54. Mueller, S. N., C. M. Jones, C. M. Smith, W. R. Heath, and F. R. Carbone. 2002.  
7 Rapid cytotoxic T lymphocyte activation occurs in the draining lymph nodes after  
8 cutaneous herpes simplex virus infection as a result of early antigen presentation and not  
9 the presence of virus. *J. Exp. Med.* 195: 651–656.
- 10 55. Kaye, J., N. J. Vasquez, and S. M. Hedrick. 1992. Involvement of the same region of  
11 the T cell antigen receptor in thymic selection and foreign peptide recognition. *J.*  
12 *Immunol.* 148: 3342–3353.
- 13 56. Smith, C. M., G. T. Belz, N. S. Wilson, J. A. Villadangos, K. Shortman, F. R.  
14 Carbone, and W. R. Heath. 2003. Cutting Edge: Conventional CD8<sup>+</sup> Dendritic Cells Are  
15 Preferentially Involved in CTL Priming After Footpad Infection with Herpes Simplex  
16 Virus-1. *The Journal of Immunology* 170: 4437–4440.
- 17 57. Sanderson, S., and N. Shastri. 1994. LacZ inducible, antigen/MHC-specific T cell  
18 hybrids. *International Immunology* 6: 369–376.
- 19 58. Clarke, S. R., M. Barnden, C. Kurts, F. R. Carbone, J. F. Miller, and W. R. Heath.  
20 2000. Characterization of the ovalbumin-specific TCR transgenic line OT-I: MHC  
21 elements for positive and negative selection. *Immunol Cell Biol* 78: 110–117.
- 22 59. Langhorne, J., B. Simon-Haarhaus, and S. J. Meding. 1990. The role of CD4<sup>+</sup> T cells  
23 in the protective immune response to *Plasmodium chabaudi* in vivo. *Immunol. Lett.* 25:

- 1 101–107.
- 2 60. Meding, S. J., and J. Langhorne. 1991. CD4+ T cells and B cells are necessary for the  
3 transfer of protective immunity to *Plasmodium chabaudi chabaudi*. *Eur. J. Immunol.* 21:  
4 1433–1438.
- 5 61. Voisine, C., B. Mastelic, A.-M. Sponaas, and J. Langhorne. 2010. Classical CD11c+  
6 dendritic cells, not plasmacytoid dendritic cells, induce T cell responses to *Plasmodium*  
7 *chabaudi* malaria. *International Journal for Parasitology* 40: 711–719.
- 8 62. Vremec, D., J. Pooley, H. Hochrein, L. Wu, and K. Shortman. 2000. CD4 and CD8  
9 expression by dendritic cell subtypes in mouse thymus and spleen. *J. Immunol.* 164:  
10 2978–2986.
- 11 63. Caminschi, I., A. I. Proietto, F. Ahmet, S. Kitsoulis, J. Shin Teh, J. C. Y. Lo, A.  
12 Rizzitelli, L. Wu, D. Vremec, S. L. H. van Dommelen, I. K. Campbell, E. Maraskovsky,  
13 H. Braley, G. M. Davey, P. Mottram, N. van de Velde, K. Jensen, A. M. Lew, M. D.  
14 Wright, W. R. Heath, K. Shortman, and M. H. Lahoud. 2008. The dendritic cell subtype-  
15 restricted C-type lectin Clec9A is a target for vaccine enhancement. *Blood* 112: 3264–  
16 3273.
- 17 64. Naik, S. H., D. Metcalf, A. van Nieuwenhuijze, I. Wicks, L. Wu, M. O’Keeffe, and K.  
18 Shortman. 2006. Intrasplenic steady-state dendritic cell precursors that are distinct from  
19 monocytes. *Nat. Immunol.* 7: 663–671.
- 20 65. Mintern, J. D., C. Macri, and J. A. Villadangos. 2015. ScienceDirectModulation of  
21 antigen presentation by intracellular trafficking. *Current Opinion in Immunology* 34: 16–  
22 21.
- 23 66. deWalick, S., F. H. Amante, K. A. McSweeney, L. M. Randall, A. C. Stanley, A.

- 1 Haque, R. D. Kuns, K. P. A. MacDonald, G. R. Hill, and C. R. Engwerda. 2007. Cutting  
2 edge: conventional dendritic cells are the critical APC required for the induction of  
3 experimental cerebral malaria. *J. Immunol.* 178: 6033–6037.
- 4 67. Zhao, H., T. Aoshi, S. Kawai, Y. Mori, A. Konishi, M. Ozkan, Y. Fujita, Y. Haseda,  
5 M. Shimizu, M. Kohyama, K. Kobiyama, K. Eto, J. Nabekura, T. Horii, T. Ishino, M.  
6 Yuda, H. Hemmi, T. Kaisho, S. Akira, M. Kinoshita, K. Tohyama, Y. Yoshioka, K. J.  
7 Ishii, and C. Coban. 2014. Olfactory Plays a Key Role in Spatiotemporal Pathogenesis of  
8 Cerebral Malaria. *Cell Host & Microbe* 15: 551–563.
- 9 68. Edelson, B. T., T. R. Bradstreet, K. C. Wumesh, K. Hildner, J. W. Herzog, J. Sim, J.  
10 H. Russell, T. L. Murphy, E. R. Unanue, and K. M. Murphy. 2011. Batf3-Dependent  
11 CD11b<sup>low</sup>/– Peripheral Dendritic Cells Are GM-CSF-Independent and Are Not  
12 Required for Th Cell Priming after Subcutaneous Immunization. *PLoS ONE* 6: e25660.
- 13 69. Caminschi, I., D. Vremec, F. Ahmet, M. H. Lahoud, J. A. Villadangos, K. M.  
14 Murphy, W. R. Heath, and K. Shortman. 2012. Molecular Immunology. *Molecular*  
15 *Immunology* 50: 9–17.
- 16 70. Aliberti, J., O. Schulz, D. J. Pennington, H. Tsujimura, C. Reis e Sousa, K. Ozato,  
17 and A. Sher. 2003. Essential role for ICSBP in the in vivo development of murine  
18 CD8 $\alpha$  + dendritic cells. *Blood* 101: 305–310.
- 19 71. Kato, Y., A. Zaid, G. M. Davey, S. N. Mueller, S. L. Nutt, D. Zotos, D. M. Tarlinton,  
20 K. Shortman, M. H. Lahoud, W. R. Heath, and I. Caminschi. 2015. Targeting Antigen to  
21 Clec9A Primes Follicular Th Cell Memory Responses Capable of Robust Recall. *The*  
22 *Journal of Immunology* 195: 1006–1014.
- 23 72. Lahoud, M. H., F. Ahmet, S. Kitsoulis, S. S. Wan, D. Vremec, C. N. Lee, B. Phipson,



- 1 W. Shi, G. K. Smyth, A. M. Lew, Y. Kato, S. N. Mueller, G. M. Davey, W. R. Heath, K.  
2 Shortman, and I. Caminschi. 2011. Targeting Antigen to Mouse Dendritic Cells via  
3 Clec9A Induces Potent CD4 T Cell Responses Biased toward a Follicular Helper  
4 Phenotype. *The Journal of Immunology* 187: 842–850.
- 5 73. Iborra, S., M. Martínez-López, S. C. Khouili, M. Enamorado, F. J. Cueto, R. Conde-  
6 Garrosa, C. del Fresno, and D. Sancho. 2016. Optimal Generation of Tissue-Resident but  
7 Not Circulating Memory T Cells during Viral Infection Requires Crosspriming by  
8 DNCR-1. *Immunity* 1–15.
- 9 74. Mintern, J. D., G. M. Davey, G. T. Belz, F. R. Carbone, and W. R. Heath. 2002.  
10 Cutting Edge: Precursor Frequency Affects the Helper Dependence of Cytotoxic T Cells.  
11 *The Journal of Immunology* 168: 977–980.
- 12 75. Bennett, S. R., F. R. Carbone, F. Karamalis, R. A. Flavell, J. F. Miller, and W. R.  
13 Heath. 1998. Help for cytotoxic-T-cell responses is mediated by CD40 signalling. *Nature*  
14 393: 478–480.
- 15 76. Ridge, J. P., F. Di Rosa, and P. Matzinger. 1998. A conditioned dendritic cell can be a  
16 temporal bridge between a CD4+ T-helper and a T-killer cell. *Nature* 393: 474–478.
- 17 77. Schoenberger, S. P., R. E. Toes, E. I. van der Voort, R. Offringa, and C. J. Melief.  
18 1998. T-cell help for cytotoxic T lymphocytes is mediated by CD40-CD40L interactions.  
19 *Nature* 393: 480–483.
- 20 78. Sturm, A. 2006. Manipulation of Host Hepatocytes by the Malaria Parasite for  
21 Delivery into Liver Sinusoids. *Science* 313: 1287–1290.
- 22 79. Villegas-Mendez, A., R. Greig, T. N. Shaw, J. B. de Souza, E. Gwyer Findlay, J. S.  
23 Stumhofer, J. C. R. Hafalla, D. G. Blount, C. A. Hunter, E. M. Riley, and K. N. Couper.

- 1 2012. IFN- $\gamma$ -Producing CD4<sup>+</sup> T Cells Promote Experimental Cerebral Malaria by  
2 Modulating CD8<sup>+</sup> T Cell Accumulation within the Brain. *The Journal of Immunology*  
3 189: 968–979.
- 4 80. Su, Z., and M. M. Stevenson. 2002. IL-12 Is Required for Antibody-Mediated  
5 Protective Immunity Against Blood-Stage Plasmodium chabaudi AS Malaria Infection in  
6 Mice. *The Journal of Immunology* 168: 1348–1355.
- 7 81. Wikenheiser, D. J., D. Ghosh, B. Kennedy, and J. S. Stumhofer. 2016. The  
8 Costimulatory Molecule ICOS Regulates Host Th1 and Follicular Th Cell Differentiation  
9 in Response to Plasmodium chabaudi chabaudi AS Infection. *The Journal of Immunology*  
10 196: 778–791.
- 11 82. Iyoda, T., S. Shimoyama, K. Liu, Y. Omatsu, Y. Akiyama, Y. Maeda, K. Takahara,  
12 R. M. Steinman, and K. Inaba. 2002. The CD8<sup>+</sup> dendritic cell subset selectively  
13 endocytoses dying cells in culture and in vivo. *J. Exp. Med.* 195: 1289–1302.
- 14 83. Nitcheu, J., O. Bonduelle, C. Combadiere, M. Tefit, D. Seilhean, D. Mazier, and B.  
15 Combadiere. 2003. Perforin-dependent brain-infiltrating cytotoxic CD8<sup>+</sup> T lymphocytes  
16 mediate experimental cerebral malaria pathogenesis. *J. Immunol.* 170: 2221–2228.
- 17 84. Piguet, P. F., C. D. Kan, C. Vesin, A. Rochat, Y. Donati, and C. Barazzone. 2001.  
18 Role of CD40-CD40L in mouse severe malaria. *The American Journal of Pathology*  
19 159: 733–742.
- 20 85. Villarino, N. F., G. R. LeCleir, J. E. Denny, S. P. Dearth, C. L. Harding, S. S. Sloan,  
21 J. L. Gribble, S. R. Campagna, S. W. Wilhelm, and N. W. Schmidt. 2016. Composition of  
22 the gut microbiota modulates the severity of malaria. *Proceedings of the National*  
23 *Academy of Sciences* 113: 2235–2240.

- 1 86. Urban, B. C., D. Cordery, M. J. Shafi, P. C. Bull, C. I. Newbold, T. N. Williams, and
- 2 K. MARSH. 2006. The Frequency of BDCA3-Positive Dendritic Cells Is Increased in the
- 3 Peripheral Circulation of Kenyan Children with Severe Malaria. *Infection and Immunity*
- 4 74: 6700–6706.
- 5
- 6

## 1 **Figure legends**

2

3 **Fig 1. MHC II restriction of the D78 hybridoma.** Dendritic cells were enriched from the  
4 spleens of WT B6 (filled circle), MHC I deficient (inverted triangle) or MHC II deficient  
5 (upright triangle) mice and cultured for 1h with titrated amounts of lysed blood-stage PbA  
6 iRBC before adding  $5 \times 10^4$  D78 hybridoma cells. 40h later, IL-2 concentrations in the  
7 supernatants were measured by ELISA. Data points denote mean of IL-2 concentration and  
8 error bars represent SEM. Data were pooled from 2 independent experiments. Statistical  
9 analysis was performed on log-transformed data using unpaired t tests. Asterisks denote  
10 significant differences between WT and MHC II deficient DC (\*\*,  $P < 0.01$ ). No statistical  
11 differences were found between WT and MHC I deficient DC.

12

13 **Fig 2. Characterization of T cells from the spleen and lymph nodes of PbT-II mice.**  
14 Cells were harvested from the spleen and the lymph nodes of PbT-II transgenic or control  
15 B6 (WT) mice. FACS analysis was performed to characterize the expression of CD4, CD8  
16 and the transgenic TCR alpha ( $V\alpha 2$ ) and beta ( $V\beta 12$ ) chains. (A) Representative plots  
17 showing the proportions of  $CD4^+$  versus  $CD8^+$   $Thy1.2^+$  cells in the spleen and inguinal  
18 lymph node of PbT-II and WT mice. (B) Representative histograms showing the expression  
19 of the transgenic TCR  $V\alpha 2$  and  $V\beta 12$  chains on the CD4 or CD8 single positive cells  
20 from the spleen. Data are representative for 2 independent experiments.

21

22 **Fig 3. PbT-II cells are cross-reactive with multiple *Plasmodium* species and with liver**  
23 **stage PbA.** (A) Cross-reactivity with murine malaria parasites.  $10^6$  CTV-labelled PbT-II

1 cells were transferred into B6 recipients one day before infection with  $10^4$  iRBC from  
2 *Plasmodium berghei* ANKA (PbA), *P. berghei* NK65, *P. chabaudi* AS, *P. yoelii* 17XNL  
3 or nothing. 5 days after *P. berghei* ANKA and *P. berghei* NK65 infection, or 7 days after  
4 *P. chabaudi* AS and *P. yoelii* 17XNL infection, mice were killed and PbT-II proliferation  
5 was assessed in the spleen. *Left*. Number of proliferating cells. *Right*. Representative  
6 histograms showing PbT-II proliferation. Data are representative for 2 independent  
7 experiments. Data were log transformed and analysed using One Way ANOVA and  
8 Dunnet's Multiple comparisons test. Asterisks denote statistical differences with the  
9 uninfected group (\*\*\*,  $P < 0.001$ ) (B) Cross-reactivity with *P. falciparum*.  $2 \times 10^5$  Splenic  
10 DC were cultured with  $10^5$  CFSE-coated PbT-II cells and titrated amounts of *P. falciparum*  
11 (Pf)- or PbA-iRBC for 3 days. PbT-II proliferation was assessed by flow cytometry. *Left*.  
12 Percentages of proliferating PbT-II cells to Pf or PbA antigen. *Right*. Representative  
13 histogram showing PbT-II proliferation to Pf-iRBC (solid black line), PbA iRBC (dotted  
14 line) and a negative control containing no antigen (tinted grey line). (C) Cross-reactivity  
15 with liver stage PbA parasites.  $10^6$  CTV-labelled PbT-II cells were transferred into  
16 recipient B6 mice one day before infection with  $5 \times 10^4$  *P. berghei* ANKA radiation  
17 attenuated sporozoites (RAS) or  $10^4$  PbA iRBC. 6 days later mice were killed and PbT-II  
18 proliferation was assessed in the spleen. *Left*. Number of proliferating cells. *Right*.  
19 Representative histograms showing PbT-II proliferation. The tinted line represents  
20 uninfected control. The solid and dotted black lines show PbT-II cell proliferation in mice  
21 infected with PbA RAS or iRBC respectively. Data were pooled from 2 independent  
22 experiments. Data were log transformed and analysed using One Way ANOVA and  
23 Tukey's Multiple comparisons test (\*\*,  $P < 0.01$ ; \*\*\*,  $P < 0.001$ )

1 **Fig 4. PbT-II cells can elicit immunity to *P. chabaudi* infection.** CD40L-deficient mice  
2 (CD40L KO), RAG-deficient mice (RAG KO) and WT control mice received either  $5 \times 10^5$   
3 PbT-II cells or no cells one day before infection with  $10^4$  *P. chabaudi* iRBC. (A) Survival  
4 of WT mice (n=10), CD40L-deficient mice with or without PbT-II cells (n=7 and 6  
5 respectively) and RAG-deficient mice with or without PbT-II cells (n=8 and 7 respectively).  
6 Data were analysed using logrank test. Asterisks denote statistical difference between  
7 CD40L KO vs CD40L KO+PbT-II cells and RAG KO vs RAG KO+PbT-II cells  
8 respectively (\*\*\*,  $P < 0.001$ ). (B) Course of parasitaemia after *P. chabaudi* infection. Blood  
9 samples were examined by FACS. The dotted red line represents background staining in  
10 uninfected mice. Data were log transformed and analysed using one way ANOVA and  
11 Tukey's Multiple Comparison test. A statistical difference was found on day 9 between  
12 RAG KO and RAG KO+PbT-II (\*,  $P < 0.05$ ). No difference was found between CD40L KO  
13 and CD40L KO+PbT-II mice on day 9. Statistically significant differences between both  
14 CD40L KO+PbT-II or Rag KO+PbT-II mice and WT mice was found on day 19 (\*\*\*,  
15  $P < 0.001$ ). (C) Parasite-specific IgG antibodies in CD40L KO mice. *P. chabaudi*-specific  
16 IgG end-point titers were determined on day 9 after infection using ELISA. Cut-off values  
17 were determined as  $2 \times \text{SD}$  above average  $\text{OD}_{405\text{nm}-492\text{nm}}$  values of control wells containing  
18 no plasma. Data were log transformed and analysed using a One Way ANOVA and  
19 Tuckey's Multiple Comparison Test (\*\*\*,  $P < 0.001$ ). The dotted line represents the limit of  
20 detection of the assay.

21

22 **Fig 5.  $\text{CD8}^+$  DC are more efficient than other DC subtypes at stimulating D78**  
23 **hybridoma cells *in vitro* and *ex vivo*.** (A) D78 stimulation by DC subtypes *in vitro*.  $5 \times 10^4$

1 sorted CD4<sup>+</sup>, CD8<sup>+</sup> or DN DC from naive B6 mice were pre-incubated for 1h with titrated  
2 amounts of PbA iRBC. 5x10<sup>4</sup> D78 hybridoma cells were then added to the culture and  
3 incubated for a further 40h before supernatants were collected and IL-2 concentrations  
4 measured by ELISA. (B) D78 stimulation by DC subtypes *ex vivo*. 5x10<sup>4</sup> sorted CD4<sup>+</sup>,  
5 CD8<sup>+</sup> or DN DC from the spleens of B6 mice infected with 10<sup>6</sup> PbA iRBC 3 days earlier  
6 were incubated with 5x10<sup>4</sup> D78 hybridoma cells for 40h before supernatants were collected  
7 and IL-2 concentrations measured by ELISA. (C) Presentation of soluble OVA antigen to  
8 the OT-II hybridoma. 5x10<sup>4</sup> sorted CD4<sup>+</sup>, CD8<sup>+</sup> or DN DC from naive B6 mice were pre-  
9 incubated for 1h with titrated amounts of soluble OVA. 5x10<sup>4</sup> OT-II hybridoma cells were  
10 then added to the culture and incubated for a further 40h before supernatants were collected  
11 and IL-2 concentrations measured by ELISA. (D) CD8<sup>+</sup> DC are more efficient than other  
12 DC subtypes at presenting RBC-associated antigen to the OT-II hybridoma *in vitro*. 5x10<sup>4</sup>  
13 sorted CD4<sup>+</sup>, CD8<sup>+</sup> or DN DC from naive B6 mice were pre-incubated for 1h with OVA-  
14 coated RBC from a naive B6 mouse. 5x10<sup>4</sup> OT-II hybridoma cells were then added to the  
15 culture and incubated for a further 40h before supernatants were collected for assessment  
16 of IL-2 concentrations by ELISA. Data were pooled from 3 independent experiments in A-  
17 C and from 4 independent experiments in D. Data were log-transformed and statistically  
18 analysed using One-way ANOVA (\*, P<0.05; \*\*, P<0.01; \*\*\*, P<0.001).

19

20 **Fig 6. PbT-II priming during blood stage PbA infection is exclusively done by DC,**  
21 **among which the CD8<sup>+</sup> subset is the major contributor.** 10<sup>6</sup> CTV-labelled PbT-II cells  
22 were adoptively transferred into different DC deficient recipient mice or WT controls,  
23 which were infected with 10<sup>4</sup> PbA iRBC 1-2 days later. Proliferation of PbT-II cells was

1 measured in the spleen on day 5 after PbA infection. Total divided cells in the spleen (upper  
2 graph) and the corresponding representative histograms for proliferation (below) are shown  
3 in each subfigure. The different groups in the upper graph are represented in the histograms  
4 below as solid black lines (DC deficient mice), dotted lines (WT control mice) and tinted  
5 grey lines (uninfected mice). (A) PbT-II proliferation in DT-treated B6->B6 or CD11c-  
6 DTR->B6 chimeras. Mice were treated with 100 µg DT i.p. on days -1, 1 and 3 after  
7 infection. (B) PbT-II proliferation in WT or Batf3 KO mice. (C) PbT-II proliferation in  
8 WT or IRF8 KO mice. (D) PbT-II proliferation in DT-treated WT or XCR1-DTRvenus  
9 mice. Mice were treated with 500 µg DT i.p. on days -1, 0, 1 and 2 after infection. Data  
10 were pooled from 2 independent experiments in A and D, and 3 independent experiments  
11 in B and C. For statistical analysis, data were log transformed and analysed using one way  
12 ANOVA followed by Tukey's Multiple comparisons test (n.s.=not significant; \*, P<0.05,  
13 \*\*, P<0.01, \*\*\*, P<0.001). (E) Percentages of PbT-II proliferation in DC deficient mice  
14 compared with their WT counterparts. Data derived from A-D was normalized to facilitate  
15 comparisons between individual experiments. First, the average of divided PbT-II cells in  
16 WT mice in each experiment was calculated. That number was then used to calculate the  
17 percentage of PbT-II divided cells in both KO mice (CD11cDTR->B6, light grey circles;  
18 Batf3 KO, black circles; IRF8 KO, dark grey circles; XCR1-DTRvenus mice, white circles)  
19 or their respective WT counterparts (whose normalised proliferation would therefore  
20 average 100%). Data in E were statistically compared using Kruskal-Wallis tests followed  
21 by Dunn's multiple comparisons test for differences between the individual groups (\*\*\*,  
22 P<0.001). (F) Transcription factor expression in splenic PbT-II cells and endogenous CD4<sup>+</sup>  
23 and CD8<sup>+</sup> T cells primed in the presence or absence of CD8<sup>+</sup> DC. XCR1-DTRvenus mice



1 received  $5 \times 10^5$  PbT-II/uGFP cells and were infected with  $10^4$  PbA iRBC one day later.  
2 These mice were treated with either DT (500 $\mu$ g/dose) or PBS on days -1, 0, 1, 2, 4 and 6  
3 p.i. and killed on day 7. Data points represent individual mice that were pooled from 2  
4 independent experiments, log transformed and statistically analysed using an unpaired t  
5 test (\*,  $P < 0.05$ , \*\*,  $P < 0.01$ , \*\*\*,  $P < 0.001$ ). Data are represented as mean $\pm$ SEM.

6

7 **Fig 7. CD8<sup>+</sup> DC are critical for CD8<sup>+</sup> T cell priming and ECM development after PbA**

8 **infection.** (A) PbT-I proliferation in Batf3-deficient mice. WT B6 or Batf3-deficient (Batf3  
9 KO) mice were infected with  $10^4$  PbA iRBC and 2 days later  $10^6$  CFSE-labelled PbT-I  
10 cells were adoptively transferred. 3 days later, spleens were harvested and analysed for  
11 proliferation of PbT-I cells. *Left.* The proliferation of PbT-I cells pooled from 3  
12 independent experiments with 2-3 mice in each experiment. Data were log transformed and  
13 PbT-I proliferation in infected WT vs Batf3-deficient groups was compared using an  
14 unpaired t test (\*\*\*,  $P < 0.001$ ). WT mice (infected and uninfected) include mice  
15 homozygous or heterozygous for functional Batf3. *Right.* Representative histogram  
16 overlay showing the proliferation of PbT-I cells in WT B6 and Batf3-deficient mice. (B)  
17 PbT-I proliferation in DT-treated PbA-infected XCR1-DTRvenus mice.  $10^6$  CTV-labelled  
18 PbT-I/uGFP cells were transferred into WT or XCR1-DTRvenus mice one day before  
19 infection with  $10^4$  PbA iRBC. Mice were treated with 500  $\mu$ g DT i.p. on days -1, 0, 1 and  
20 2 and were killed on day 5 after infection. *Left.* Numbers of divided PbT-I cells in the  
21 spleen. Data were pooled from 2 independent experiments. For statistical analysis, data  
22 were log transformed and PbT-I proliferation in infected WT vs XCR1-DTRvenus groups  
23 was compared using an unpaired t test (\*\*\*,  $P < 0.001$ ). *Right.* Representative histograms

1 showing PbT-I cell division. In A and B, each data point represents the number of  
2 proliferating PbT-I cells per spleen and the error bars represent SEM. (C) ECM  
3 development in Batf3-deficient mice. WT B6 (dotted line) or Batf3-deficient (solid line)  
4 mice were infected with  $10^4$  PbA-iRBC and the development of ECM monitored. The  
5 shaded area on the graph represents the period in which mice developed ECM. The  
6 difference in the survival between the WT and the Batf3-deficient mice is statistically  
7 significant (\*\*\*,  $P < 0.001$ ) as determined by the Log-Rank test. Data were pooled from 2  
8 independent experiments including 15 WT and 7 Batf3-deficient mice. (D) ECM  
9 development in XCR1-DTRvenus mice treated with DT during the early stages of the  
10 infection. Onset of ECM was monitored in WT (dotted line) and XCR1-DTRvenus (solid  
11 line) mice infected with  $10^4$  PbA-iRBC and treated with 500 $\mu$ g DT on days -1, 0, 1 and 2  
12 p.i. Curves were statistically compared using a Log-rank test (\*\*\*,  $P < 0.0001$ ). Data were  
13 pooled from 2 independent experiments including 10 WT and 15 XCR1-DTRvenus mice.  
14 (E) ECM development in PbA-infected Xcr1-DTRvenus mice treated with DT in a late  
15 stage of the infection. The development of ECM was monitored in WT (dotted line) and  
16 XCR1-DTRvenus (solid line) mice infected with  $10^4$  PbA-iRBC and treated with 500 $\mu$ g  
17 DT on days 5, 6, 7 and 8 p.i. Curves were statistically compared using a Log-rank test (\*,  
18  $P = 0.0159$ ). Data were pooled from 2 independent experiments including 10 WT and 14  
19 XCR1-DTRvenus mice.

20

21 **Fig 8. PbT-I priming during blood stage PbA is enhanced by CD4<sup>+</sup> T cell help via**  
22 **CD40-CD40L interactions.** (A) CD4<sup>+</sup> T cell help is required for PbT-I proliferation.  $10^6$   
23 CTV-labelled PbT-I/uGFP cells were transferred into WT or MHC II-deficient (MHC II

1 KO) mice one day before infection with  $10^4$  PbA iRBC. Numbers of divided PbT-I cells  
2 were assessed on day 5 after infection. *Left*. Numbers of divided PbT-I cells in the spleen.  
3 *Right*. Representative histograms showing PbT-I cell division. (B) CD4<sup>+</sup> T cell help is  
4 required independently of the starting number of PbT-I cells.  $10^6$ ,  $10^5$  or  $10^4$  CTV-labelled  
5 PbT-I/uGFP cells were transferred into WT (black circles) or MHC II-deficient (white  
6 circles) mice, which were infected with  $10^4$  PbA iRBC one day later. Numbers of divided  
7 PbT-I cells in the spleens were assessed on day 5 after infection. (C) B6 mice were depleted  
8 of CD4 T cells by the injection of 100  $\mu$ g GK1.5 antibody on days -7 and -4 after infection  
9 or left untreated and received  $10^6$  PbT-I cells one day before infection with  $10^6$ ,  $10^5$  or  $10^4$   
10 PbA iRBC. Numbers of divided PbT-I cells were estimated on day 5 after infection. Grey:  
11 PbT-I numbers in uninfected WT mice. Data were log transformed and analysed using an  
12 unpaired t-test (\*\*\*,  $P < 0.001$ ; \*\*,  $P < 0.01$ ; \*,  $P < 0.05$ ; ns, not significant). Data were pooled  
13 from 2-4 independent experiments. (D) PbT-I proliferation after PbA infection is decreased  
14 in CD40L-deficient (CD40L KO) and CD40-deficient (CD40 KO) mice. WT, CD40-  
15 deficient or CD40L-deficient mice received  $10^6$  CTV-labelled PbT-I/uGFP cells and were  
16 infected with  $10^4$  PbA iRBC one day later. Numbers of divided PbT-I cells were assessed  
17 on day 5 after infection. *Left*. Numbers of divided PbT-I cells in the spleen. *Right*.  
18 Representative histograms showing PbT-I cell division. (E) PbT-II cells restored PbT-I  
19 proliferation in PbA-infected CD40L-deficient mice. WT or CD40L-deficient mice were  
20 adoptively transferred with  $10^6$  CTV-labelled PbT-I cells and some mice also received  $10^6$   
21 CTV-labelled PbT-II cells. One day later, mice were infected with  $10^4$  PbA iRBC.  
22 Numbers of divided PbT-I cells were assessed on day 5 after infection. *Left*. Numbers of  
23 divided PbT-I cells in the spleen. *Right*. Representative histograms showing PbT-I cell

1 division. Data were log transformed and analysed using One way ANOVA and Tukey's  
2 multiple comparisons test (\*\*\*,  $P < 0.001$ ; \*\*,  $P < 0.01$ ; \*,  $P < 0.05$ ; ns, not significant). Data  
3 were pooled from 2-3 independent experiments. (F) PbT-II cells accelerate ECM  
4 development in CD40L-deficient mice. CD40L-deficient mice received  $10^6$  PbT-II cells  
5 (black squares, solid line) or no cells (white squares, solid line) and, together with WT  
6 control mice (black circles, dotted line), were infected with  $10^4$  PbA iRBC one day later.  
7 Mice were then monitored for development of ECM. Survival curves of CD40L-deficient  
8 mice with or without PbT-II cells were statistically compared using a Log-rank test (\*\*,  
9  $P = 0.0011$ ). Data were pooled from 2 independent experiments including 13 WT, 7 CD40L-  
10 deficient mice that received PbT-II cells and 8 CD40L-deficient mice that did not receive  
11 PbT-II cells.

12

13

14

15

16

Figure 1

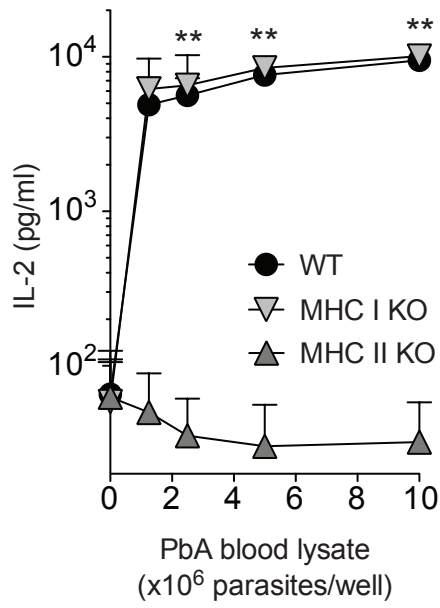

Figure 2

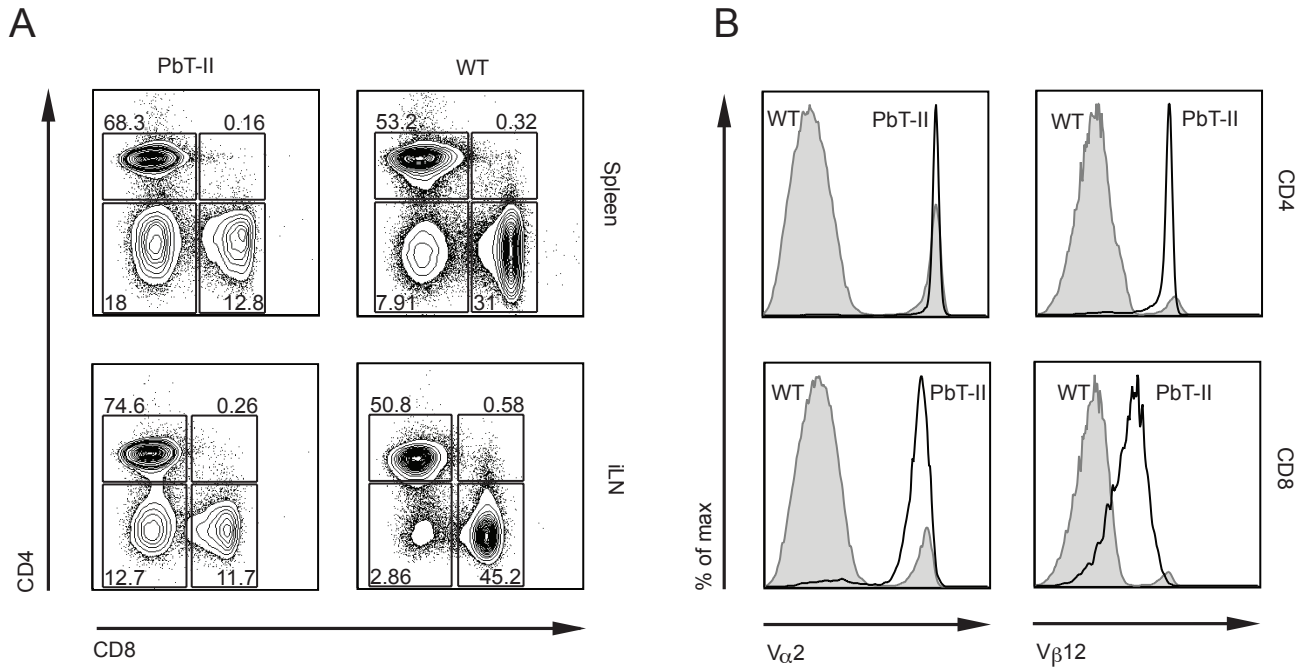

Figure 3

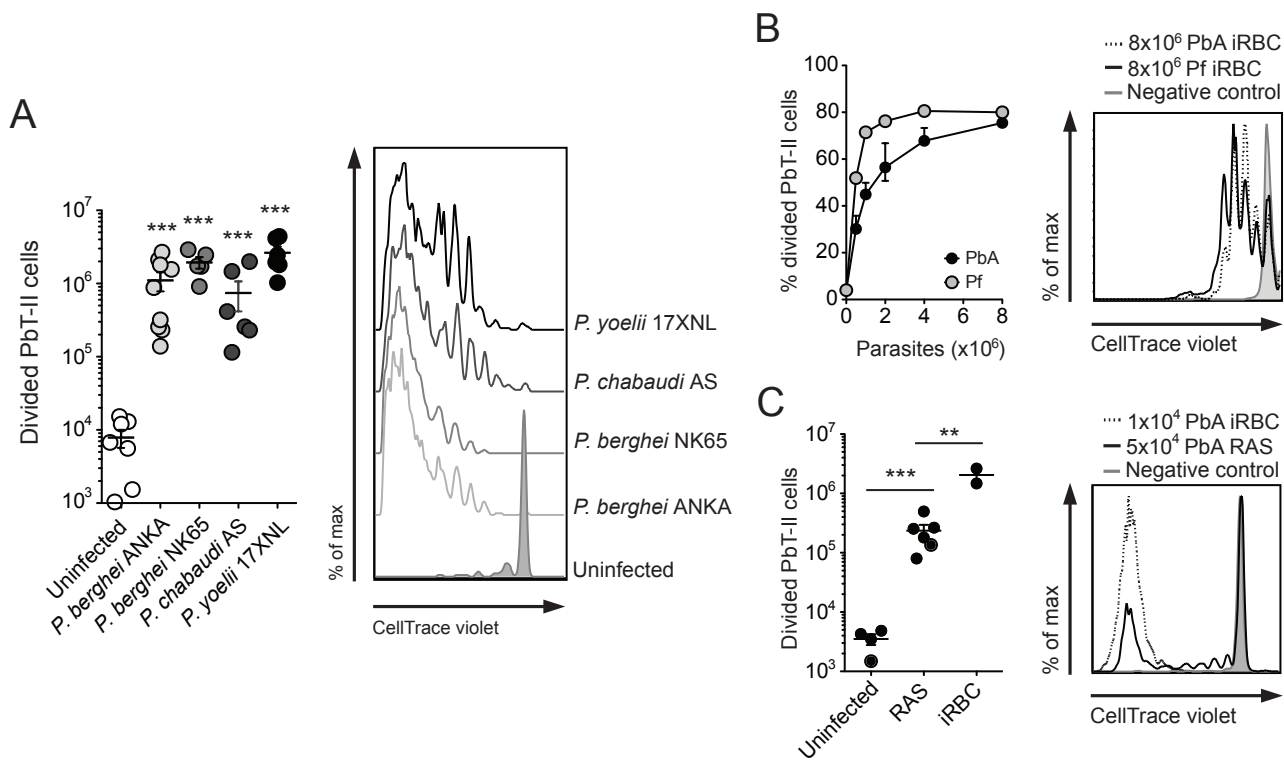

# Figure 4

## A

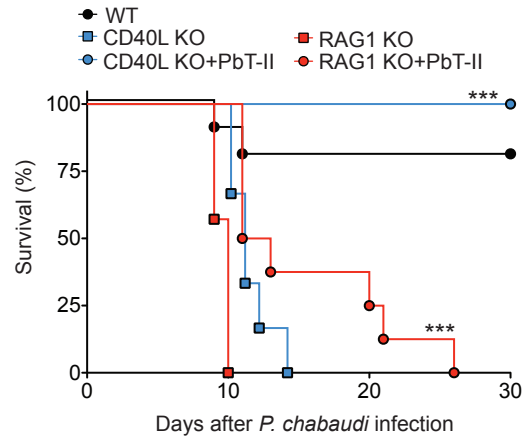

## B

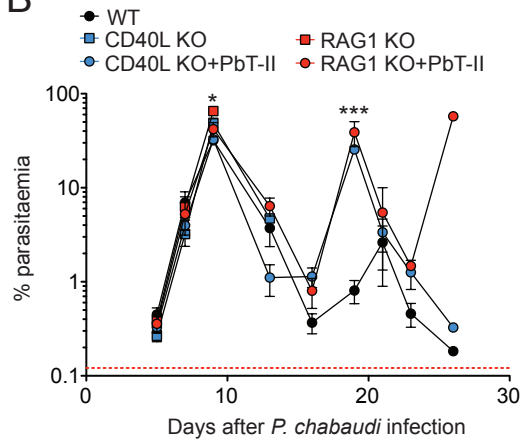

## C

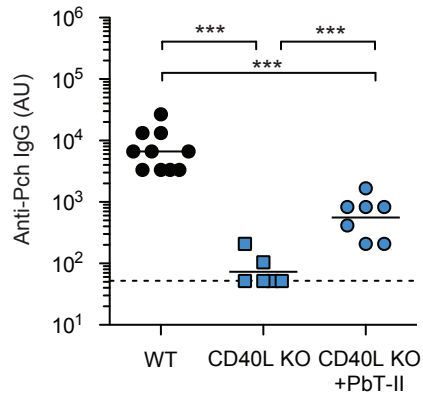



Figure 5

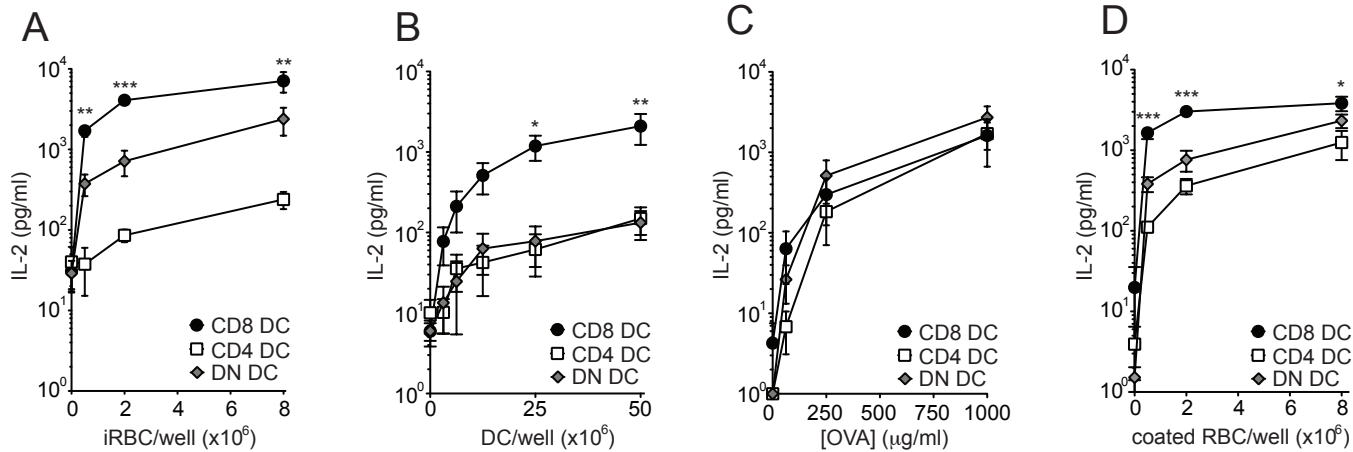

Figure 6

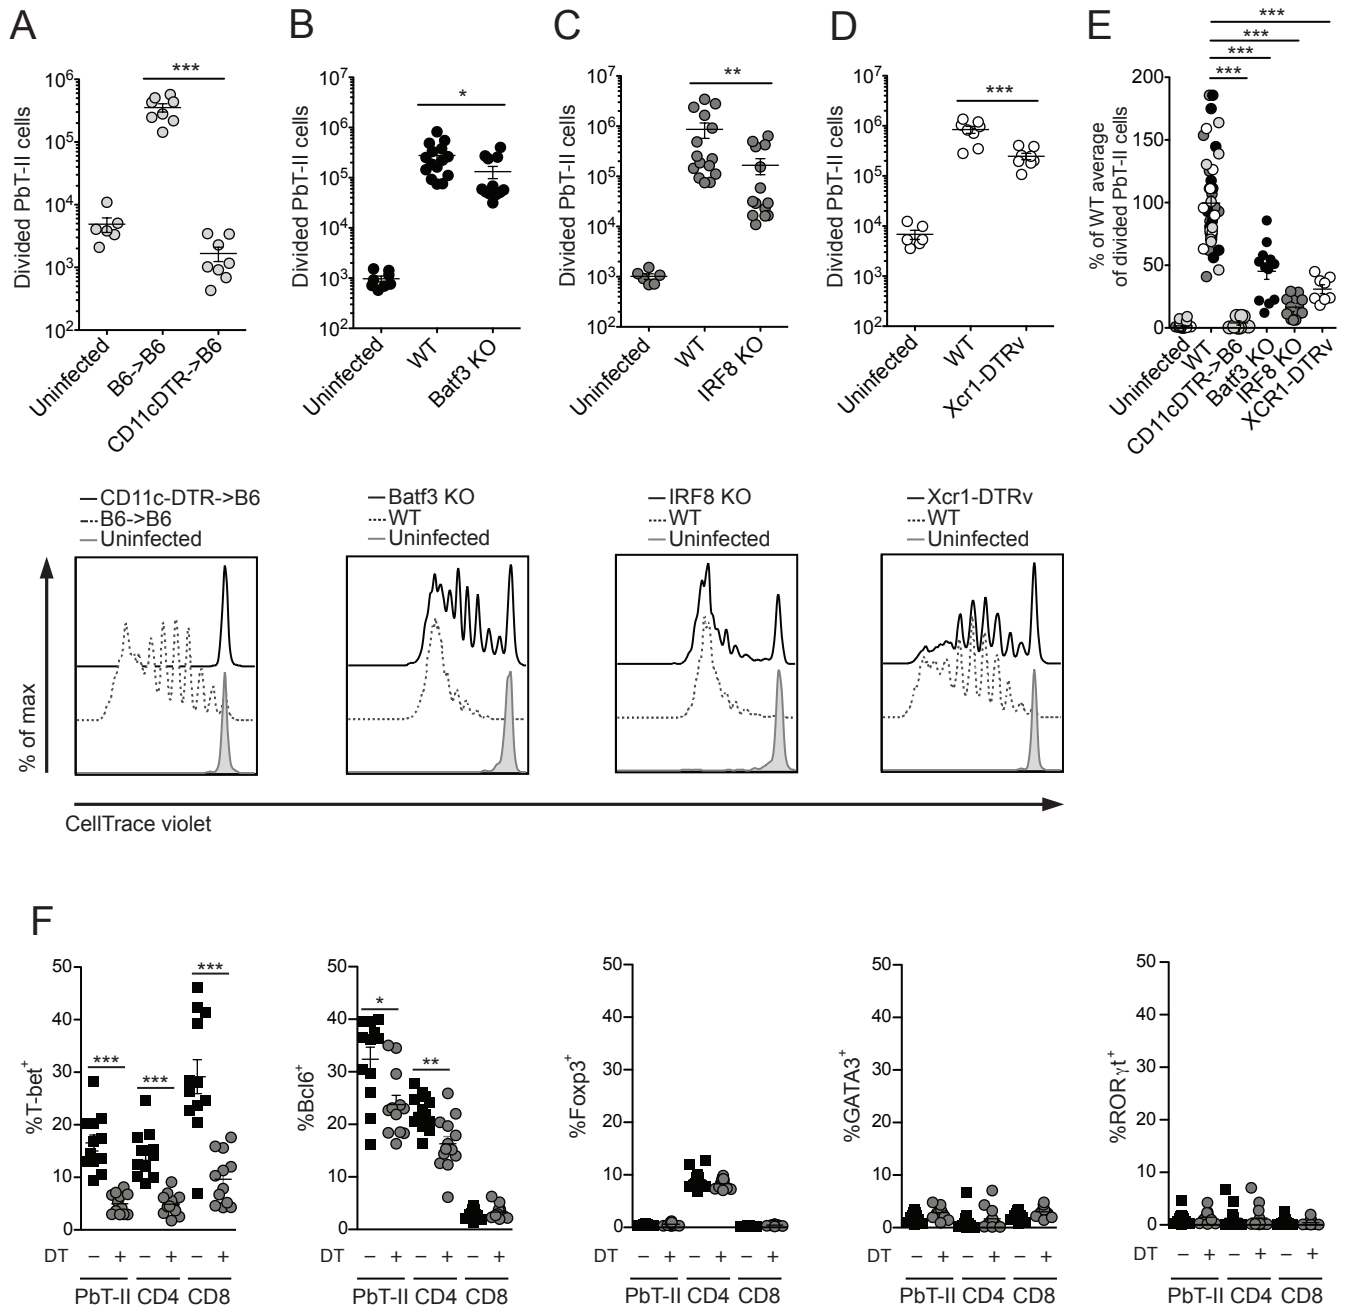

Figure 7

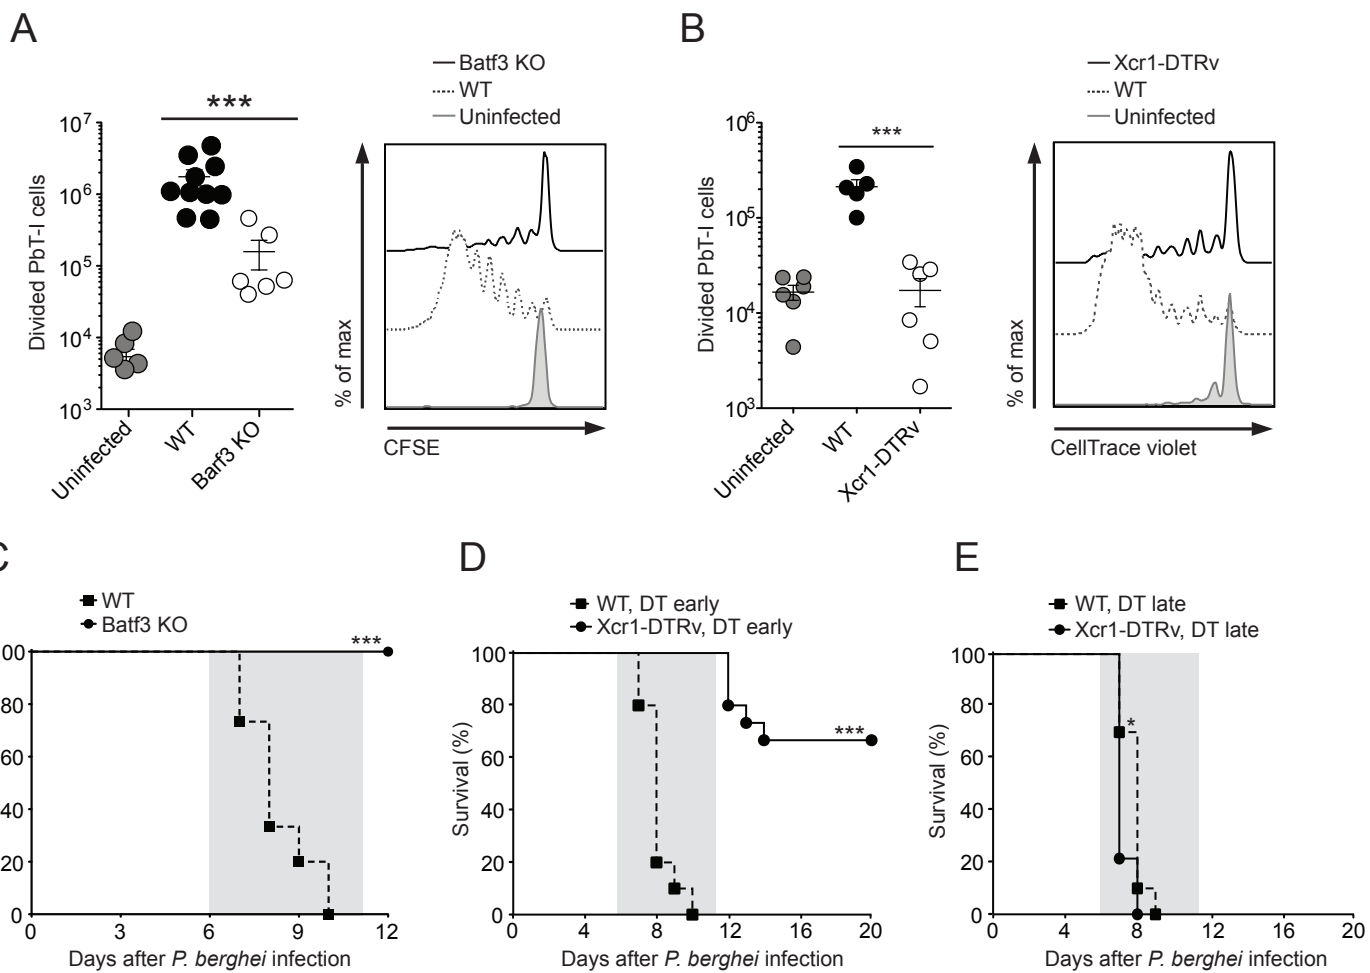

# Figure 8

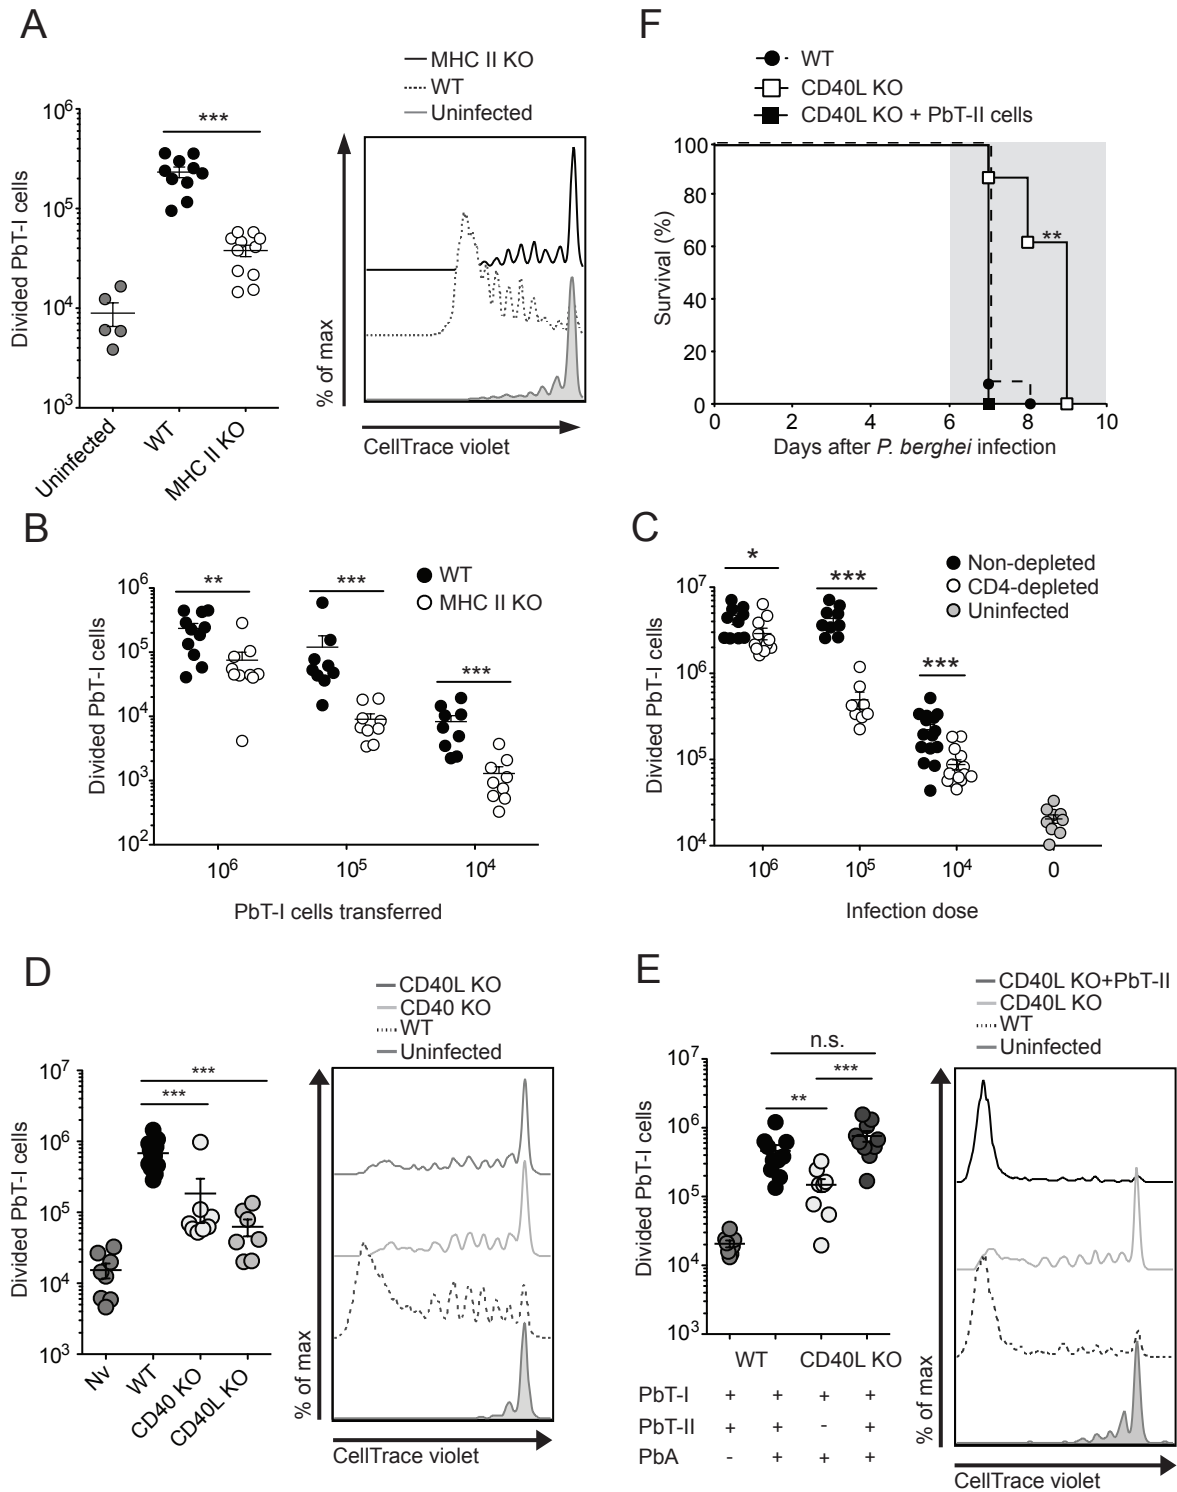

Source: http://www.biorxiv.org/content/10.1101/113837v1.full.pdf
